# Supplementary material for: Molecular and clinical diversity in primary central nervous system lymphoma: a LOC Network study
Source: Research Square preprint supplement (doi:10.21203/rs.3.rs-1438980/v1), 2022-03-17
Supplement: Supplementary file 1 [file 0a1bf8b9860e23f18a31d234.xlsx]

## Sheet: Top 100 subtype specific biomarkers
Gene	Cluster	direction
IGHV3-64D	CS1	up
PPP1R2C	CS1	up
RFPL4AP1	CS1	up
IGLV7-43	CS1	up
HOXD11	CS1	up
SSX5	CS1	up
IGHV4-80	CS1	up
CAMTA1-AS1	CS1	up
CT45A5	CS1	up
KRT8P5	CS1	up
IGHV3-60	CS1	up
RPL36AP40	CS1	up
PAX2	CS1	up
CNN2P12	CS1	up
ATOH1	CS1	up
LINC01307	CS1	up
MIR4424	CS1	up
ZBTB32	CS1	up
HMX2	CS1	up
CT45A10	CS1	up
CALHM1	CS1	up
CALHM3	CS1	up
KISS1R	CS1	up
CTSLP6	CS1	up
IL17REL	CS1	up
ASH2LP2	CS1	up
CA9	CS1	up
LILRA4	CS1	up
PRSS2	CS1	up
IGHV3-19	CS1	up
HOXD9	CS1	up
SIGLEC6	CS1	up
PLUT	CS1	up
CT45A3	CS1	up
MAN1A2P1	CS1	up
RNVU1-34	CS1	up
MIR1910	CS1	up
MAGEB6	CS1	up
LL22NC03-63E9.3	CS1	up
CTSG	CS1	up
ABHD17AP5	CS1	up
RNA5SP184	CS1	up
CCR6	CS1	up
NAPSA	CS1	up
MAB21L4	CS1	up
TBX4	CS1	up
RPL7P51	CS1	up
GJA10	CS1	up
UICLM	CS1	up
UPK3A	CS1	up
NR5A1	CS1	up
RPS5P3	CS1	up
MUC5AC	CS1	up
COMP	CS1	up
RPS4XP20	CS1	up
LINC01507	CS1	up
PRAME	CS1	up
LINC02650	CS1	up
LINC01976	CS1	up
SLC22A31	CS1	up
CASC23	CS1	up
NUP210P1	CS1	up
TLX2	CS1	up
MIR3689B	CS1	up
LINC00563	CS1	up
HOXD10	CS1	up
MIR1205	CS1	up
GGT4P	CS1	up
AMN	CS1	up
NAPSB	CS1	up
LINC01820	CS1	up
CST8	CS1	up
VAV3-AS1	CS1	up
HSPD1P3	CS1	up
KNOP1P1	CS1	up
MTHFD2P6	CS1	up
MKI67P1	CS1	up
HMGA1P6	CS1	up
KREMEN2	CS1	up
IGHV3-41	CS1	up
HTR3A	CS1	up
VN1R53P	CS1	up
NPAP1P6	CS1	up
COPDA1	CS1	up
AVPR1B	CS1	up
LCE1B	CS1	up
SPIB	CS1	up
ADGRG5	CS1	up
VDAC2P3	CS1	up
RNU6-819P	CS1	up
IL22	CS1	up
H4C13	CS1	up
H3C7	CS1	up
PRDM13	CS1	up
MIR6075	CS1	up
NKX2-5	CS1	up
DHRS9	CS1	up
CLEC4C	CS1	up
MIR200CHG	CS1	up
LINC00858	CS1	up
RNU6-329P	CS2	up
OR10T1P	CS2	up
RNU6-535P	CS2	up
RN7SL843P	CS2	up
MED14P1	CS2	up
RNA5SP349	CS2	up
RPS12P31	CS2	up
LINC02140	CS2	up
ATP6V0E1P1	CS2	up
HTN3	CS2	up
USP9YP3	CS2	up
MTND3P9	CS2	up
SNRPEP8	CS2	up
DNAJA1P4	CS2	up
LINC01007	CS2	up
MRPS17P3	CS2	up
RNU6-879P	CS2	up
MTND6P16	CS2	up
NEK4P1	CS2	up
RNU2-31P	CS2	up
SCGB1D5P	CS2	up
MTND5P22	CS2	up
RN7SL649P	CS2	up
OR4S2	CS2	up
RN7SL296P	CS2	up
LINC02382	CS2	up
RNU1-62P	CS2	up
LINC01818	CS2	up
LINC02306	CS2	up
RN7SKP89	CS2	up
RN7SL217P	CS2	up
WSPAR	CS2	up
ANKRD30BP1	CS2	up
LINC01701	CS2	up
BNIP3P36	CS2	up
LINC01476	CS2	up
MTCYBP14	CS2	up
MIR4662A	CS2	up
HNRNPA1P76	CS2	up
KCNU1	CS2	up
LINC01591	CS2	up
MIR8059	CS2	up
RNA5SP226	CS2	up
RNU6-1137P	CS2	up
RN7SL147P	CS2	up
RNA5SP222	CS2	up
LINC02189	CS2	up
PRAMEF10	CS2	up
CCND3P2	CS2	up
PTF1A	CS2	up
RN7SL464P	CS2	up
RNU6-1243P	CS2	up
HSPE1P16	CS2	up
MRPS21P9	CS2	up
LYZL4	CS2	up
RPS29P13	CS2	up
LINC02822	CS2	up
SLC25A5P4	CS2	up
LINC02799	CS2	up
ART2P	CS2	up
SRSF3P2	CS2	up
CFTRP1	CS2	up
RNU6ATAC38P	CS2	up
PGAM4P2	CS2	up
ADI1P1	CS2	up
OR2U1P	CS2	up
RNU6-824P	CS2	up
RNU6-959P	CS2	up
PPIAP88	CS2	up
RFC3P1	CS2	up
TRIM64DP	CS2	up
SUMO1P2	CS2	up
RNA5SP227	CS2	up
LINC02713	CS2	up
PRAMEF13	CS2	up
RNU4-91P	CS2	up
IFNA4	CS2	up
MIR649	CS2	up
MIR4477A	CS2	up
RNU6-768P	CS2	up
HLFP1	CS2	up
RN7SL282P	CS2	up
KIF26B-AS1	CS2	up
SLC22A9	CS2	up
HCRTR2	CS2	up
RPS27AP8	CS2	up
RN7SL783P	CS2	up
RNU4-35P	CS2	up
RNA5SP429	CS2	up
OR9I1	CS2	up
RPL17P13	CS2	up
RNA5SP279	CS2	up
LINC02063	CS2	up
VAMP9P	CS2	up
MEP1AP1	CS2	up
MTND3P4	CS2	up
MTND2P41	CS2	up
HMGB1P48	CS2	up
RNU7-50P	CS2	up
HMGB1P46	CS2	up
IGKV1-17	CS3	up
YRDCP1	CS3	up
IGHV3-73	CS3	up
TRBV12-5	CS3	up
LINC01228	CS3	up
TBL1XR1-AS1	CS3	up
VTRNA1-2	CS3	up
PRR15L	CS3	up
HMGB1P17	CS3	up
IGKV1-6	CS3	up
RN7SKP211	CS3	up
FBP1	CS3	up
PRSS51	CS3	up
IGHV1-69D	CS3	up
CCL26	CS3	up
KCNQ1-AS1	CS3	up
SCN4A	CS3	up
HNRNPA1P27	CS3	up
IFITM3P2	CS3	up
CCL3L1	CS3	up
ASMT	CS3	up
CA5A	CS3	up
MIR548O	CS3	up
SLC2A9-AS1	CS3	up
MRGPRX4	CS3	up
PMEL	CS3	up
TRAV1-1	CS3	up
ALLC	CS3	up
IL4	CS3	up
FTLP12	CS3	up
TAS1R1	CS3	up
MYEOV	CS3	up
LINC00545	CS3	up
SLC10A3	CS3	up
MIR148A	CS3	up
PPP1R27	CS3	up
TRAV24	CS3	up
TMEM18-DT	CS3	up
TRBV14	CS3	up
NOL4	CS3	up
XKRX	CS3	up
MTUS2-AS1	CS3	up
MIR4513	CS3	up
CLDN14	CS3	up
TRAJ11	CS3	up
TRAV2	CS3	up
LINC02715	CS3	up
H2BC4	CS3	up
LINC02357	CS3	up
SAMSN1-AS1	CS3	up
LINC02539	CS3	up
CCL4L2	CS3	up
TESC-AS1	CS3	up
TRBV12-3	CS3	up
AREG	CS3	up
UNQ6494	CS3	up
TRAV26-1	CS3	up
OR7E140P	CS3	up
ASTL	CS3	up
SMIM38	CS3	up
AKAP14	CS3	up
TRAV10	CS3	up
LAMB4	CS3	up
LYZ	CS3	up
TNFSF4	CS3	up
RGS1	CS3	up
LINC02422	CS3	up
CFAP73	CS3	up
ADM	CS3	up
H2BC8	CS3	up
TRAJ44	CS3	up
TRBV29-1	CS3	up
TSC22D3	CS3	up
TXK	CS3	up
ZDHHC20P1	CS3	up
TNFSF8	CS3	up
TRAJ9	CS3	up
LINC00426	CS3	up
MIR593	CS3	up
MYO7A	CS3	up
LRRIQ4	CS3	up
SLC16A6P1	CS3	up
TRAJ43	CS3	up
RPL23AP81	CS3	up
LAX1	CS3	up
FBXL13	CS3	up
H2AC8	CS3	up
LINC02332	CS3	up
TNFRSF18	CS3	up
PLCG1-AS1	CS3	up
LINC02341	CS3	up
IRAK3	CS3	up
PSMD10P1	CS3	up
LINC01353	CS3	up
PLA2G7	CS3	up
NR4A1	CS3	up
DUSP4	CS3	up
TEC	CS3	up
GLCCI1	CS3	up
EGR2	CS3	up
ACOD1	CS4	up
TRAV12-2	CS4	up
CXCR2P1	CS4	up
TRAJ22	CS4	up
KLRC1	CS4	up
TRAV12-1	CS4	up
TRBV4-1	CS4	up
GNLY	CS4	up
LINC01871	CS4	up
GBP5	CS4	up
FCRL6	CS4	up
TRAV5	CS4	up
LINC02195	CS4	up
LINC02528	CS4	up
CD8B	CS4	up
KLRD1	CS4	up
CD244	CS4	up
TRAV21	CS4	up
CTSW	CS4	up
CASP5	CS4	up
HSD11B1-AS1	CS4	up
GZMA	CS4	up
ANKRD22	CS4	up
TRAV29DV5	CS4	up
CD8A	CS4	up
TRAV22	CS4	up
SH2D1A	CS4	up
LEMD1	CS4	up
SECTM1	CS4	up
XCL2	CS4	up
TRBV12-4	CS4	up
NKG7	CS4	up
CD7	CS4	up
TRH	CS4	up
FASLG	CS4	up
GRIN3A	CS4	up
TLR8	CS4	up
KIR3DL1	CS4	up
SUCNR1	CS4	up
CXCR6	CS4	up
CCL5	CS4	up
MARCO	CS4	up
CXCL9	CS4	up
IDO1	CS4	up
KIR3DL2	CS4	up
UBASH3A	CS4	up
SIRPG	CS4	up
CEACAM4	CS4	up
RGL4	CS4	up
THEMIS	CS4	up
CCL8	CS4	up
IFNL1	CS4	up
LINC02446	CS4	up
IFNG	CS4	up
PRF1	CS4	up
CALHM6	CS4	up
CD3E	CS4	up
EOMES	CS4	up
GZMK	CS4	up
NAT8B	CS4	up
RNY4P18	CS4	up
GPR171	CS4	up
SPATA20P1	CS4	up
LINC02084	CS4	up
KLRC4-KLRK1	CS4	up
CD209	CS4	up
ASCL2	CS4	up
IL27	CS4	up
TRBV5-1	CS4	up
CD5L	CS4	up
CST7	CS4	up
KCNJ15	CS4	up
TRGC2	CS4	up
TRBV6-1	CS4	up
APOL4	CS4	up
TRDJ1	CS4	up
DTHD1	CS4	up
AOAH-IT1	CS4	up
GIMAP7	CS4	up
TRBJ1-1	CS4	up
TRDV1	CS4	up
NMUR1	CS4	up
GIMAP5	CS4	up
CD6	CS4	up
CCL18	CS4	up
TC2N	CS4	up
KLRC4	CS4	up
RN7SKP26	CS4	up
NT5C3AP2	CS4	up
LILRB2	CS4	up
SIGLEC1	CS4	up
TRBV7-9	CS4	up
C2	CS4	up
C1QB	CS4	up
LAG3	CS4	up
C1QA	CS4	up
TRBV11-2	CS4	up
TRAV8-2	CS4	up
TRGV2	CS4	up
CCR5	CS4	up
