# Supplementary material for: Molecular and clinical diversity in primary central nervous system lymphoma: a LOC Network study
Source: Research Square preprint supplement (doi:10.21203/rs.3.rs-1438980/v1), 2022-03-17
Supplement: Supplementary file 2 [file 2817e8c3f3ce88cccde4bb9a.xlsx]

## Sheet: FFPE MRI locations
Feature	CS1	CS2	CS3	CS4	TMB	pval.CS1	pval.CS2	pval.CS3	pval.CS4
important tumor size	1	4	4	8	17	0.993617	0.603173	0.352756	0.308679
meningeal infiltration in CSF	0	0	6	0	6	1	1	1.28619e-05	1
Multiple lesions	2	0	3	5	10	0.732522	1	0.249146	0.33184
Multiple small lesions	0	1	0	0	1	1	0.233333	1	1
pachymeningitis	0	0	1	0	1	1	1	0.177778	1
spinal cord T8	0	0	1	0	1	1	1	0.177778	1
Ventriculitis	1	0	3	1	5	0.744284	1	0.0375799	0.920846
Brainstem	0	2	2	0	4	1	0.231065	0.143778	1
Cerebellum	3	3	1	1	8	0.27508	0.27508	0.805568	0.984293
Corpus callosum	9	3	5	15	32	0.292305	0.996868	0.749456	0.176445
Frontal	7	6	4	11	28	0.49971	0.706004	0.808594	0.569392
Meningeal	0	0	1	0	1	1	1	0.177778	1
Midbrain	0	3	2	2	7	1	0.202769	0.362421	0.837036
Midline	1	0	1	0	2	0.414232	1	0.325593	1
Parietal	4	4	3	5	16	0.544925	0.544925	0.577809	0.834598
Periventricular	1	0	2	4	7	0.855596	1	0.362421	0.261229
Temporal	5	5	4	12	26	0.803625	0.803625	0.746841	0.252666
Thalamus	2	2	2	4	10	0.732522	0.732522	0.565295	0.597177
Basal ganglia	1	1	0	2	4	0.661669	0.661669	1	0.507168
Bulbar	0	1	1	0	2	1	0.414232	0.325593	1
Insula	2	2	2	5	11	0.784532	0.784532	0.623256	0.434658
Occipital	1	2	0	1	4	0.661669	0.231065	1	0.866525
spinal cord	0	0	1	0	1	1	1	0.177778	1
V4	0	0	1	0	1	1	1	0.177778	1
Bilateral	4	3	3	6	16	0.544925	0.784391	0.577809	0.653651
Left	6	3	6	10	25	0.564649	0.973721	0.252771	0.539427
Middle	5	6	5	9	25	0.767259	0.564649	0.4743	0.720297
Right	6	7	1	9	23	0.459642	0.254237	0.994765	0.583559
Genu	1	1	0	2	4	0.661669	0.661669	1	0.507168
Splenium	3	2	1	5	11	0.498479	0.784532	0.899535	0.434658
