# Supplementary material for: Molecular and clinical diversity in primary central nervous system lymphoma: a LOC Network study
Source: Research Square preprint supplement (doi:10.21203/rs.3.rs-1438980/v1), 2022-03-17
Supplement: Supplementary file 3 [file 7325ea348e8841d600370d47.xlsx]

## Sheet: Mutations and Indels summary
Tumor_Sample_Barcode	Frame_Shift_Del	Frame_Shift_Ins	In_Frame_Del	In_Frame_Ins	Missense_Mutation	Nonsense_Mutation	Nonstop_Mutation	Splice_Site	Translation_Start_Site	total	Amp	Del	CNV_total
CNSL100T	0	1	0	0	3676	44	4	1	4	3730	489	3356	3845
CNSL108T	1	0	0	1	3534	47	6	2	7	3598	199	1581	1780
CNSL047T	66	429	28	241	1064	153	2	6	4	1993	421	528	949
CNSL078T	23	145	18	74	530	39	0	2	1	832	494	2255	2749
CNSL120T	101	20	3	0	585	31	0	13	0	753	0	1045	1045
CNSL065T	22	154	8	70	377	49	1	3	3	687	775	1792	2567
CNSL066T	38	112	16	55	380	48	1	5	4	659	568	1525	2093
CNSL080T	26	125	12	73	361	45	2	6	1	651	220	2517	2737
CNSL068T	25	93	8	57	394	57	2	3	5	644	24	1039	1063
CNSL056T	14	150	11	78	321	47	1	6	0	628	79	1847	1926
CNSL089T	23	125	11	59	367	32	0	2	5	624	394	2504	2898
CNSL115T	17	109	10	51	358	31	3	3	1	583	696	1728	2424
CNSL090T	22	49	11	38	417	28	1	7	1	574	14	802	816
CNSL094T	16	85	13	50	365	35	3	2	0	569	353	371	724
CNSL092T	21	100	14	51	334	34	0	4	3	561	13	236	249
CNSL079T	12	111	14	74	309	27	2	6	1	556	447	1488	1935
CNSL067T	16	106	7	66	295	35	0	6	1	532	412	2389	2801
CNSL086T	14	102	11	53	286	25	0	2	1	494	38	1116	1154
CNSL114T	15	1	1	0	369	26	0	10	2	424	0	0	0
CNSL077T	16	99	12	54	208	19	0	3	1	412	103	62	165
CNSL051T	14	25	2	16	317	26	0	3	1	404	193	899	1092
CNSL118T	4	1	2	0	321	17	1	8	1	355	662	27	689
CNSL033T	0	0	0	0	306	16	0	11	1	334	387	2151	2538
CNSL009T	0	0	0	0	295	8	0	4	0	307	23	1029	1052
CNSL063T	0	0	0	0	288	6	2	5	3	304	52	81	133
CNSL026T	0	0	0	0	290	7	0	0	1	298	1	2137	2138
CNSL099T	10	4	2	0	219	19	0	6	1	261	92	2153	2245
CNSL039T	0	0	0	0	214	21	0	7	0	242	570	455	1025
CNSL025T	0	0	0	0	198	13	0	4	1	216	122	214	336
CNSL109T	4	1	0	0	198	9	0	0	3	215	0	0	0
CNSL116T	6	2	1	0	182	12	0	5	1	209	474	891	1365
CNSL071T	3	0	0	0	192	8	1	3	1	208	478	2449	2927
CNSL125T	3	0	0	0	187	13	0	5	0	208	430	285	715
CNSL074T	1	2	2	0	185	11	0	5	1	207	290	1743	2033
CNSL010T	0	0	0	0	191	10	0	4	1	206	842	2353	3195
CNSL002T	0	0	0	0	181	13	1	5	2	202	655	1691	2346
CNSL046T	0	0	0	0	186	10	0	3	1	200	0	0	0
CNSL127T	1	2	2	0	170	10	0	14	0	199	272	970	1242
CNSL055T	0	0	0	0	176	15	0	4	2	197	76	2341	2417
CNSL105T	4	1	1	1	172	10	0	6	0	195	455	3557	4012
CNSL113T	1	0	1	0	175	13	0	0	1	191	144	439	583
CNSL098T	6	1	1	0	170	7	0	5	0	190	664	1096	1760
CNSL030T	0	0	0	0	171	10	0	9	0	190	350	534	884
CNSL133T	3	2	1	0	169	8	0	6	0	189	677	4863	5540
CNSL024T	0	0	0	0	166	14	0	7	0	187	506	3546	4052
CNSL053T	0	0	0	0	172	10	0	4	1	187	564	2931	3495
CNSL129T	4	1	1	0	163	10	0	5	1	185	575	1262	1837
CNSL049T	0	0	0	0	160	13	1	4	0	178	607	670	1277
CNSL075T	2	3	2	0	145	20	0	5	0	177	144	2652	2796
CNSL110T	0	1	1	0	157	7	0	5	0	171	869	402	1271
CNSL119T	2	2	0	0	148	14	0	4	0	170	498	2504	3002
CNSL112T	4	0	1	1	144	12	1	7	0	170	159	1786	1945
CNSL014T	0	0	0	0	158	6	0	1	1	166	536	2268	2804
CNSL117T	4	2	2	0	139	11	0	3	1	162	839	1835	2674
CNSL121T	0	4	0	0	148	6	0	4	0	162	314	2284	2598
CNSL061T	0	0	0	0	147	11	0	3	0	161	277	1778	2055
Sample_3004T	0	0	0	0	146	6	0	5	0	157	0	0	0
CNSL130T	4	2	0	0	137	12	0	1	0	156	138	131	269
CNSL013T	0	0	0	0	132	16	0	3	0	151	489	313	802
CNSL027T	0	0	0	0	139	6	1	4	0	150	293	2884	3177
CNSL102T	4	0	1	0	131	12	0	2	0	150	533	588	1121
CNSL126T	2	2	2	0	129	8	0	7	0	150	93	1008	1101
CNSL005T	0	0	0	0	133	9	0	4	2	148	138	293	431
CNSL050T	0	0	0	0	131	7	2	5	1	146	959	1960	2919
CNSL041T	0	0	0	0	137	7	0	0	0	144	91	1712	1803
CNSL062T	0	0	0	0	128	9	0	4	0	141	328	613	941
CNSL128T	6	0	3	0	122	6	0	3	0	140	151	1433	1584
CNSL029T	0	0	0	0	126	9	0	4	0	139	154	3146	3300
CNSL107T	3	0	3	0	125	6	0	0	2	139	138	457	595
CNSL031T	0	0	0	0	125	10	0	3	0	138	516	1997	2513
CNSL045T	0	0	0	0	116	11	0	5	0	132	606	314	920
CNSL132T	0	1	2	0	114	8	0	5	0	130	434	641	1075
CNSL035T	0	0	0	0	123	6	0	1	0	130	109	290	399
CNSL034T	0	0	0	0	114	12	0	2	0	128	410	1313	1723
6652T	6	1	1	1	106	5	1	5	0	126	285	595	880
CNSL040T	0	0	0	0	116	6	0	3	0	125	238	1399	1637
CNSL011T	0	0	0	0	114	5	0	2	1	122	172	3296	3468
CNSL048T	0	0	0	0	98	8	0	3	1	110	138	36	174
CNSL104T	1	1	1	0	99	6	0	0	1	109	101	1781	1882
CNSL037T	0	0	0	0	101	7	0	1	0	109	427	14	441
8096T	4	0	1	0	93	6	0	4	0	108	0	0	0
7836T	2	1	1	0	89	12	0	2	0	107	410	1944	2354
s_2972T	0	0	0	0	96	9	0	1	0	106	361	1142	1503
7838T	1	5	3	0	81	8	0	6	0	104	375	2990	3365
CNSL042T	0	0	0	0	98	5	0	1	0	104	480	2126	2606
CNSL101T	0	0	0	0	95	4	0	1	0	100	342	857	1199
CNSL052T	0	0	0	0	94	5	0	0	0	99	477	1043	1520
CNSL043T	0	0	0	0	83	14	0	0	0	97	624	3434	4058
CNSL044T	0	2	0	0	84	7	0	1	0	94	193	1391	1584
CNSL069T	2	1	0	0	81	4	0	1	1	90	38	1044	1082
Sample_1282T	0	0	0	0	79	7	0	2	0	88	0	0	0
CNSL070T	1	1	1	0	68	9	0	3	0	83	540	395	935
Sample_1721T	0	0	0	0	77	3	0	1	0	81	0	0	0
CNSL001T	0	0	0	0	69	9	0	1	0	79	682	1351	2033
CNSL006T	0	0	0	0	68	5	0	0	1	74	524	3505	4029
CNSL064T	0	0	0	0	59	4	0	0	0	63	457	1063	1520
7833T	1	1	1	0	51	5	0	3	0	62	387	2095	2482
CNSL076T	0	0	0	0	56	1	1	3	1	62	86	382	468
s_2974T	0	0	0	0	58	0	0	0	1	59	406	1391	1797
s_2975T	0	0	0	0	46	5	0	3	0	54	165	987	1152
s_3025T	0	0	0	0	47	0	0	2	0	49	362	3992	4354
CNSL007T	0	0	0	0	37	7	0	2	0	46	149	3366	3515
CNSL036T	0	0	0	0	37	0	0	0	0	37	196	0	196
CNSL015T	0	0	0	0	29	2	0	1	1	33	510	1750	2260
CNSL106T	0	0	0	0	21	5	0	0	0	26	46	251	297
8095T	0	0	0	0	12	0	0	0	0	12	0	0	0
CNSL054T	0	0	0	0	10	0	0	0	0	10	0	0	0
CNSL123T	0	0	0	0	9	0	0	0	0	9	0	0	0
CNSL124T	0	0	0	0	8	1	0	0	0	9	0	0	0
CNSL111T	0	0	0	0	6	1	0	0	0	7	0	0	0
CNSL122T	0	0	0	0	5	0	0	0	0	5	0	0	0
CNSL028T	0	0	0	0	3	0	0	0	0	3	0	0	0
CNSL072T	0	0	0	0	3	0	0	0	0	3	0	0	0
7835T	0	0	0	0	2	0	0	0	0	2	0	0	0
CNSL131T	0	0	0	0	1	0	1	0	0	2	0	0	0
