# Supplementary material for: Molecular and clinical diversity in primary central nervous system lymphoma: a LOC Network study
Source: Research Square preprint supplement (doi:10.21203/rs.3.rs-1438980/v1), 2022-03-17
Supplement: Supplementary file 4 [file f1c1fe49f3dbb551798e7cea.xlsx]

## Sheet: CS1.promotersMethylation.GOenrichment
GOBPID	Pvalue	OddsRatio	ExpCount	Count	Size	Term	Meth_direction	p.adjusted
GO:0022008	2.59122e-16	3.60181	23.5411	69	1228	neurogenesis	Hyper	9.30249e-14
GO:0098916	5.07264e-12	3.76215	13.542	44	689	anterograde trans-synaptic signaling	Hyper	6.91238e-10
GO:0090596	5.77636e-12	6.10573	4.97261	26	253	sensory organ morphogenesis	Hyper	6.91238e-10
GO:0034330	1.97823e-10	3.54537	12.8738	40	655	cell junction organization	Hyper	1.77546e-08
GO:0099536	4.64351e-10	3.43532	13.2549	40	681	synaptic signaling	Hyper	3.00935e-08
GO:0120036	5.02955e-10	2.63607	27.7326	63	1411	plasma membrane bounded cell projection organization	Hyper	3.00935e-08
GO:0048731	6.22628e-10	2.33106	49.2856	91	2882	system development	Hyper	3.19319e-08
GO:0048858	3.27246e-09	3.41897	11.8714	36	604	cell projection morphogenesis	Hyper	1.46852e-07
GO:0150063	1.94649e-08	4.02461	7.23289	26	368	visual system development	Hyper	7.76434e-07
GO:0007420	2.32823e-08	3.04169	13.9941	38	712	brain development	Hyper	7.88573e-07
GO:0032989	2.41624e-08	3.037	14.0137	38	713	cellular component morphogenesis	Hyper	7.88573e-07
GO:0048870	6.49027e-08	2.26825	32.1942	64	1638	cell motility	Hyper	1.94167e-06
GO:0032501	1.39668e-07	2.03149	65.1122	102	3870	multicellular organismal process	Hyper	3.85698e-06
GO:0032879	2.50757e-07	1.95845	52.8905	89	2691	regulation of localization	Hyper	6.43013e-06
GO:0022603	2.70351e-07	2.74235	15.4047	38	807	regulation of anatomical structure morphogenesis	Hyper	6.4704e-06
GO:0048666	7.72354e-07	3.12664	9.88813	28	539	neuron development	Hyper	1.73297e-05
GO:0043583	9.77302e-07	4.54933	4.14712	17	211	ear development	Hyper	2.06383e-05
GO:0007167	1.14984e-06	2.474	18.3181	41	932	enzyme linked receptor protein signaling pathway	Hyper	2.29328e-05
GO:0021537	1.32924e-06	4.21546	4.7171	18	240	telencephalon development	Hyper	2.51156e-05
GO:0035295	1.51464e-06	2.60975	15.2192	36	800	tube development	Hyper	2.71877e-05
GO:0031344	1.6787e-06	3.21771	8.52362	25	441	regulation of cell projection organization	Hyper	2.86978e-05
GO:0007610	2.00358e-06	2.89714	10.9673	29	558	behavior	Hyper	3.26948e-05
GO:0099172	2.34428e-06	11.0218	0.884457	8	45	presynapse organization	Hyper	3.65911e-05
GO:0048863	2.7197e-06	4.43007	3.98988	16	203	stem cell differentiation	Hyper	4.06822e-05
GO:0048568	3.05741e-06	3.18581	8.23527	24	419	embryonic organ development	Hyper	4.2605e-05
GO:0048869	3.0856e-06	1.86848	54.1318	86	3104	cellular developmental process	Hyper	4.2605e-05
GO:0009880	3.66029e-06	8.51317	1.23824	9	63	embryonic pattern specification	Hyper	4.86684e-05
GO:0042391	5.06814e-06	3.271	7.33916	22	377	regulation of membrane potential	Hyper	6.49807e-05
GO:0060021	5.73021e-06	6.91538	1.65099	10	84	roof of mouth development	Hyper	6.97589e-05
GO:1901888	5.82943e-06	4.402	3.75403	15	191	regulation of cell junction assembly	Hyper	6.97589e-05
GO:0044057	6.50662e-06	2.76662	11.0262	28	561	regulation of system process	Hyper	7.53509e-05
GO:0048596	7.12279e-06	16.0178	0.491365	6	25	embryonic camera-type eye morphogenesis	Hyper	7.99088e-05
GO:0010976	1.20773e-05	4.70901	3.04646	13	155	positive regulation of neuron projection development	Hyper	0.000131387
GO:0003151	1.41414e-05	7.06785	1.45444	9	74	outflow tract morphogenesis	Hyper	0.000147873
GO:1905606	1.44166e-05	13.8311	0.550329	6	28	regulation of presynapse assembly	Hyper	0.000147873
GO:1905114	1.55375e-05	2.73778	10.299	26	524	cell surface receptor signaling pathway involved in cell-cell signaling	Hyper	0.000154943
GO:0065007	1.59921e-05	1.72096	232.573	267	11833	biological regulation	Hyper	0.000155166
GO:0001944	1.7296e-05	2.61321	11.634	28	608	vasculature development	Hyper	0.000163402
GO:0021846	2.56886e-05	18.1722	0.371336	5	19	cell proliferation in forebrain	Hyper	0.000231294
GO:0022610	2.57709e-05	1.98381	28.2436	51	1437	biological adhesion	Hyper	0.000231294
GO:0007416	2.9564e-05	6.37198	1.59065	9	83	synapse assembly	Hyper	0.000249638
GO:0023051	2.96698e-05	1.89942	34.8017	59	1893	regulation of signaling	Hyper	0.000249638
GO:0040017	2.9901e-05	2.57435	11.3407	27	577	positive regulation of locomotion	Hyper	0.000249638
GO:2000026	3.07351e-05	2.05694	23.9319	45	1233	regulation of multicellular organismal development	Hyper	0.00025077
GO:0001501	4.07573e-05	2.68877	9.63075	24	490	skeletal system development	Hyper	0.000325153
GO:0001502	4.47197e-05	15.8061	0.412746	5	21	cartilage condensation	Hyper	0.000349008
GO:0010646	4.82647e-05	1.87134	34.5908	58	1882	regulation of cell communication	Hyper	0.00036866
GO:0030539	5.69448e-05	14.8755	0.432401	5	22	male genitalia development	Hyper	0.0004259
GO:0010975	5.96331e-05	3.38316	5.1109	16	268	regulation of neuron projection development	Hyper	0.000436904
GO:0051272	7.40992e-05	2.47571	11.3014	26	575	positive regulation of cellular component movement	Hyper	0.000532032
GO:0070374	8.53152e-05	3.61747	4.18643	14	213	positive regulation of ERK1 and ERK2 cascade	Hyper	0.000600552
GO:0048167	8.98915e-05	4.09031	3.1904	12	164	regulation of synaptic plasticity	Hyper	0.000620597
GO:0060485	9.84575e-05	3.56496	4.24275	14	219	mesenchyme development	Hyper	0.000659258
GO:0001667	9.96772e-05	2.64734	8.92318	22	454	ameboidal-type cell migration	Hyper	0.000659258
GO:0061061	0.000101001	2.38138	12.1858	27	620	muscle structure development	Hyper	0.000659258
GO:0071363	0.000106186	3.20945	5.36916	16	283	cellular response to growth factor stimulus	Hyper	0.000680728
GO:0002009	0.000109196	4.32511	2.77155	11	146	morphogenesis of an epithelium	Hyper	0.000685514
GO:0060537	0.000110752	2.77217	7.74391	20	394	muscle tissue development	Hyper	0.000685514
GO:0198738	0.000116641	2.6846	8.39251	21	427	cell-cell signaling by wnt	Hyper	0.000709729
GO:0018108	0.000131729	2.81763	7.23289	19	368	peptidyl-tyrosine phosphorylation	Hyper	0.000788179
GO:0060041	0.000139652	4.19862	2.84992	11	145	retina development in camera-type eye	Hyper	0.000821398
GO:0021707	0.000144037	50.3164	0.117928	3	6	cerebellar granule cell differentiation	Hyper	0.000821398
GO:0016079	0.000144145	5.09696	1.9458	9	99	synaptic vesicle exocytosis	Hyper	0.000821398
GO:0007411	0.000165134	3.57663	3.91984	13	201	axon guidance	Hyper	0.0009263
GO:0051240	0.000171806	1.89436	25.7591	45	1329	positive regulation of multicellular organismal process	Hyper	0.000937614
GO:0014032	0.000173641	5.65219	1.57237	8	80	neural crest cell development	Hyper	0.000937614
GO:0016358	0.000174986	3.36088	4.48125	14	228	dendrite development	Hyper	0.000937614
GO:0050679	0.000178313	3.54702	3.95057	13	201	positive regulation of epithelial cell proliferation	Hyper	0.000941386
GO:0060562	0.00018923	2.92319	6.23051	17	317	epithelial tube morphogenesis	Hyper	0.000984546
GO:0051968	0.000192913	10.991	0.550329	5	28	positive regulation of synaptic transmission, glutamatergic	Hyper	0.000989368
GO:0045667	0.000206191	4.36262	2.49613	10	127	regulation of osteoblast differentiation	Hyper	0.00104257
GO:0048557	0.000221306	16.8134	0.314473	4	16	embryonic digestive tract morphogenesis	Hyper	0.00110346
GO:0001656	0.000224544	5.42513	1.63133	8	83	metanephros development	Hyper	0.00110426
GO:0060449	0.000248391	37.7351	0.137582	3	7	bud elongation involved in lung branching	Hyper	0.00120503
GO:0071300	0.000278777	6.126	1.27755	7	65	cellular response to retinoic acid	Hyper	0.00132009
GO:0006928	0.000279461	2.73411	7.06585	18	401	movement of cell or subcellular component	Hyper	0.00132009
GO:0038084	0.000300167	7.41316	0.923766	6	47	vascular endothelial growth factor signaling pathway	Hyper	0.00139948
GO:0090066	0.000309406	2.42767	9.67006	22	492	regulation of anatomical structure size	Hyper	0.00142406
GO:0050804	0.000342566	4.48815	2.17962	9	118	modulation of chemical synaptic transmission	Hyper	0.00146457
GO:0007156	0.000348069	3.74718	3.16439	11	161	homophilic cell adhesion via plasma membrane adhesion molecules	Hyper	0.00146457
GO:0035107	0.000358861	4.04883	2.67302	10	136	appendage morphogenesis	Hyper	0.00146457
GO:0042693	0.000360699	14.4098	0.353783	4	18	muscle cell fate commitment	Hyper	0.00146457
GO:0001736	0.00036918	5.82368	1.33651	7	68	establishment of planar polarity	Hyper	0.00146457
GO:0019226	0.00036918	5.82368	1.33651	7	68	transmission of nerve impulse	Hyper	0.00146457
GO:0006836	0.000371207	3.46962	3.714	12	190	neurotransmitter transport	Hyper	0.00146457
GO:0042472	0.00037745	4.98929	1.75896	8	90	inner ear morphogenesis	Hyper	0.00146457
GO:0048013	0.000378252	7.06753	0.963075	6	49	ephrin receptor signaling pathway	Hyper	0.00146457
GO:0045937	0.000382012	2.03503	16.8243	32	856	positive regulation of phosphate metabolic process	Hyper	0.00146457
GO:0001997	0.000385182	Inf	0.0393092	2	2	positive regulation of the force of heart contraction by epinephrine-norepinephrine	Hyper	0.00146457
GO:0030538	0.000385182	Inf	0.0393092	2	2	embryonic genitalia morphogenesis	Hyper	0.00146457
GO:0060595	0.000385182	Inf	0.0393092	2	2	fibroblast growth factor receptor signaling pathway involved in mammary gland specification	Hyper	0.00146457
GO:0060615	0.000385182	Inf	0.0393092	2	2	mammary gland bud formation	Hyper	0.00146457
GO:0060667	0.000385182	Inf	0.0393092	2	2	branch elongation involved in salivary gland morphogenesis	Hyper	0.00146457
GO:0060915	0.000385182	Inf	0.0393092	2	2	mesenchymal cell differentiation involved in lung development	Hyper	0.00146457
GO:0021683	0.00039164	30.1863	0.157237	3	8	cerebellar granular layer morphogenesis	Hyper	0.00146457
GO:0060452	0.00039164	30.1863	0.157237	3	8	positive regulation of cardiac muscle contraction	Hyper	0.00146457
GO:0007612	0.000403226	3.98509	2.71233	10	138	learning	Hyper	0.00149235
GO:0050654	0.000429848	9.02563	0.648602	5	33	chondroitin sulfate proteoglycan metabolic process	Hyper	0.00157465
GO:0048639	0.000451657	3.62521	3.26266	11	166	positive regulation of developmental growth	Hyper	0.00163783
GO:0050890	0.000486705	2.88587	5.54259	15	282	cognition	Hyper	0.00174727
GO:0050807	0.000492685	3.35432	3.83265	12	195	regulation of synapse organization	Hyper	0.00175123
GO:0072132	0.000524166	6.60542	1.02204	6	52	mesenchyme morphogenesis	Hyper	0.00182358
GO:0072028	0.000524681	5.464	1.41513	7	72	nephron morphogenesis	Hyper	0.00182358
GO:0030111	0.00052828	2.75203	6.1912	16	315	regulation of Wnt signaling pathway	Hyper	0.00182358
GO:0060173	0.000552085	3.53317	3.34128	11	170	limb development	Hyper	0.00188761
GO:0003018	0.000566968	2.96702	5.03158	14	256	vascular process in circulatory system	Hyper	0.00189301
GO:0048387	0.000578917	25.1537	0.176891	3	9	negative regulation of retinoic acid receptor signaling pathway	Hyper	0.00189301
GO:0098953	0.000578917	25.1537	0.176891	3	9	receptor diffusion trapping	Hyper	0.00189301
GO:0098970	0.000578917	25.1537	0.176891	3	9	postsynaptic neurotransmitter receptor diffusion trapping	Hyper	0.00189301
GO:0009887	0.000580031	2.42057	8.80412	20	492	animal organ morphogenesis	Hyper	0.00189301
GO:0045165	0.000601013	4.13168	2.35374	9	124	cell fate commitment	Hyper	0.00194382
GO:0030166	0.000643463	6.32944	1.06135	6	54	proteoglycan biosynthetic process	Hyper	0.00206253
GO:0021884	0.0006734	11.8647	0.412746	4	21	forebrain neuron development	Hyper	0.00213939
GO:0021953	0.000689912	3.7005	2.90355	10	149	central nervous system neuron differentiation	Hyper	0.00217262
GO:0030198	0.000697686	2.78001	5.73914	15	292	extracellular matrix organization	Hyper	0.00217799
GO:0043009	0.000734495	2.18028	11.6945	24	595	chordate embryonic development	Hyper	0.00227314
GO:0007218	0.000743295	4.467	1.9458	8	99	neuropeptide signaling pathway	Hyper	0.00228071
GO:0033674	0.000752985	2.36346	8.98215	20	457	positive regulation of kinase activity	Hyper	0.00229086
GO:0048812	0.000783778	3.37541	3.4842	11	187	neuron projection morphogenesis	Hyper	0.00235287
GO:0040011	0.000786473	3.96766	2.44299	9	139	locomotion	Hyper	0.00235287
GO:0007413	0.00081039	11.2049	0.432401	4	22	axonal fasciculation	Hyper	0.00235958
GO:0021697	0.00081039	11.2049	0.432401	4	22	cerebellar cortex formation	Hyper	0.00235958
GO:0060563	0.00081039	11.2049	0.432401	4	22	neuroepithelial cell differentiation	Hyper	0.00235958
GO:0140059	0.000815008	21.5591	0.196546	3	10	dendrite arborization	Hyper	0.00235958
GO:0035051	0.000859457	3.58919	2.9875	10	152	cardiocyte differentiation	Hyper	0.00246836
GO:0001837	0.000903892	3.56388	3.00715	10	153	epithelial to mesenchymal transition	Hyper	0.00257537
GO:0001525	0.000923389	3.30431	3.55476	11	188	angiogenesis	Hyper	0.00261021
GO:2000311	0.000965926	10.6146	0.452056	4	23	regulation of AMPA receptor activity	Hyper	0.00270912
GO:0030855	0.00108528	2.15224	11.3273	23	582	epithelial cell differentiation	Hyper	0.00296907
GO:0060174	0.00110437	18.8631	0.216201	3	11	limb bud formation	Hyper	0.00296907
GO:0060601	0.00110437	18.8631	0.216201	3	11	lateral sprouting from an epithelium	Hyper	0.00296907
GO:0009946	0.00114049	100.345	0.0589638	2	3	proximal/distal axis specification	Hyper	0.00296907
GO:0060596	0.00114049	100.345	0.0589638	2	3	mammary placode formation	Hyper	0.00296907
GO:0061074	0.00114049	100.345	0.0589638	2	3	regulation of neural retina development	Hyper	0.00296907
GO:0070346	0.00114049	100.345	0.0589638	2	3	positive regulation of fat cell proliferation	Hyper	0.00296907
GO:1905072	0.00114049	100.345	0.0589638	2	3	cardiac jelly development	Hyper	0.00296907
GO:0010842	0.00114131	10.0832	0.47171	4	24	retina layer formation	Hyper	0.00296907
GO:0050927	0.00114131	10.0832	0.47171	4	24	positive regulation of positive chemotaxis	Hyper	0.00296907
GO:0051094	0.00115128	1.82579	21.0435	36	1096	positive regulation of developmental process	Hyper	0.00297345
GO:0001503	0.00126311	2.71538	5.46588	14	283	ossification	Hyper	0.00323899
GO:0043410	0.00127671	2.83588	4.86458	13	255	positive regulation of MAPK cascade	Hyper	0.00325063
GO:0003205	0.00133173	3.37345	3.16439	10	161	cardiac chamber development	Hyper	0.00336685
GO:0090132	0.00134112	2.50432	6.76118	16	344	epithelium migration	Hyper	0.00336686
GO:0043269	0.0014445	2.03405	13.0113	25	662	regulation of ion transport	Hyper	0.00354394
GO:0003207	0.00145114	16.7662	0.235855	3	12	cardiac chamber formation	Hyper	0.00354394
GO:0060221	0.00145114	16.7662	0.235855	3	12	retinal rod cell differentiation	Hyper	0.00354394
GO:0071696	0.00145114	16.7662	0.235855	3	12	ectodermal placode development	Hyper	0.00354394
GO:0110148	0.00146111	3.32895	3.2037	10	163	biomineralization	Hyper	0.00354418
GO:0001709	0.0014851	6.64651	0.845147	5	43	cell fate determination	Hyper	0.0035782
GO:0003401	0.00155686	9.16549	0.511019	4	26	axis elongation	Hyper	0.00364944
GO:0033688	0.00155686	9.16549	0.511019	4	26	regulation of osteoblast proliferation	Hyper	0.00364944
GO:0099068	0.00155686	9.16549	0.511019	4	26	postsynapse assembly	Hyper	0.00364944
GO:0035296	0.00155866	3.57568	2.69268	9	137	regulation of tube diameter	Hyper	0.00364944
GO:0030278	0.0015655	3.94375	2.18166	8	111	regulation of ossification	Hyper	0.00364944
GO:0001657	0.00162058	4.43554	1.70995	7	87	ureteric bud development	Hyper	0.0037466
GO:0045444	0.00164464	2.89044	4.40263	12	224	fat cell differentiation	Hyper	0.0037466
GO:0007157	0.00164892	6.47571	0.864802	5	44	heterophilic cell-cell adhesion via plasma membrane cell adhesion molecules	Hyper	0.0037466
GO:0045933	0.00164892	6.47571	0.864802	5	44	positive regulation of muscle contraction	Hyper	0.0037466
GO:0034394	0.00171829	5.14601	1.27755	6	65	protein localization to cell surface	Hyper	0.00386109
GO:0042475	0.00173158	4.38052	1.7296	7	88	odontogenesis of dentin-containing tooth	Hyper	0.00386109
GO:0072163	0.00173158	4.38052	1.7296	7	88	mesonephric epithelium development	Hyper	0.00386109
GO:0006029	0.00175424	15.4073	0.250379	3	13	proteoglycan metabolic process	Hyper	0.0038763
GO:1902531	0.00175999	1.63845	32.037	49	1630	regulation of intracellular signal transduction	Hyper	0.0038763
GO:0003272	0.00179961	8.76647	0.530674	4	27	endocardial cushion formation	Hyper	0.00390313
GO:0061437	0.00179961	8.76647	0.530674	4	27	renal system vasculature development	Hyper	0.00390313
GO:0003197	0.00182562	6.31344	0.884457	5	45	endocardial cushion development	Hyper	0.00390313
GO:0048701	0.00182562	6.31344	0.884457	5	45	embryonic cranial skeleton morphogenesis	Hyper	0.00390313
GO:0023052	0.00184101	3.03484	3.89281	11	246	signaling	Hyper	0.00390313
GO:0007613	0.00185513	3.83145	2.24062	8	114	memory	Hyper	0.00390313
GO:0010839	0.00185915	15.0887	0.25551	3	13	negative regulation of keratinocyte proliferation	Hyper	0.00390313
GO:0060080	0.00185915	15.0887	0.25551	3	13	inhibitory postsynaptic potential	Hyper	0.00390313
GO:0030182	0.00189304	4.29341	1.75295	7	105	neuron differentiation	Hyper	0.00395117
GO:0022612	0.00196054	3.79541	2.26028	8	115	gland morphogenesis	Hyper	0.00405205
GO:0003002	0.00196395	2.4873	6.36809	15	324	regionalization	Hyper	0.00405205
GO:0010634	0.00199671	3.18197	3.34128	10	170	positive regulation of epithelial cell migration	Hyper	0.0040961
GO:0048738	0.0020517	2.80987	4.52056	12	230	cardiac muscle tissue development	Hyper	0.00418342
GO:0060292	0.00206739	8.4007	0.550329	4	28	long-term synaptic depression	Hyper	0.00418342
GO:2000027	0.00207423	4.23183	1.78427	7	92	regulation of animal organ morphogenesis	Hyper	0.00418342
GO:0045665	0.00216793	4.89613	1.33651	6	68	negative regulation of neuron differentiation	Hyper	0.00427632
GO:0060411	0.00216793	4.89613	1.33651	6	68	cardiac septum morphogenesis	Hyper	0.00427632
GO:0048593	0.00216822	4.19599	1.79804	7	93	camera-type eye morphogenesis	Hyper	0.00427632
GO:0006812	0.00219078	1.75027	21.8363	36	1111	cation transport	Hyper	0.00427632
GO:0001764	0.0022151	3.3839	2.83371	9	145	neuron migration	Hyper	0.00427632
GO:0060592	0.00222583	50.4671	0.0781668	2	4	mammary gland formation	Hyper	0.00427632
GO:0098609	0.00223388	1.86678	16.4351	29	843	cell-cell adhesion	Hyper	0.00427632
GO:0021828	0.00225132	50.1696	0.0786184	2	4	gonadotrophin-releasing hormone neuronal migration to the hypothalamus	Hyper	0.00427632
GO:0031133	0.00225132	50.1696	0.0786184	2	4	regulation of axon diameter	Hyper	0.00427632
GO:0072125	0.00225132	50.1696	0.0786184	2	4	negative regulation of glomerular mesangial cell proliferation	Hyper	0.00427632
GO:1905222	0.00225132	50.1696	0.0786184	2	4	atrioventricular canal morphogenesis	Hyper	0.00427632
GO:0010648	0.00228471	4.15392	1.8145	7	97	negative regulation of cell communication	Hyper	0.0043169
GO:0048704	0.00231241	5.94725	0.931903	5	48	embryonic skeletal system morphogenesis	Hyper	0.00433767
GO:0007158	0.00233195	13.7161	0.275164	3	14	neuron cell-cell adhesion	Hyper	0.00433767
GO:0007171	0.00233195	13.7161	0.275164	3	14	activation of transmembrane receptor protein tyrosine kinase activity	Hyper	0.00433767
GO:0048665	0.00236147	8.06419	0.569983	4	29	neuron fate specification	Hyper	0.00435885
GO:0010721	0.00236762	3.10362	3.4199	10	174	negative regulation of cell development	Hyper	0.00435885
GO:0048015	0.00246849	3.08463	3.43955	10	175	phosphatidylinositol-mediated signaling	Hyper	0.00452137
GO:0030509	0.0025257	3.31459	2.88922	9	147	BMP signaling pathway	Hyper	0.00460267
GO:0006355	0.0025567	1.46015	61.2241	82	3115	regulation of transcription, DNA-templated	Hyper	0.00463564
GO:2001141	0.00267469	1.45722	61.3223	82	3120	regulation of RNA biosynthetic process	Hyper	0.00481521
GO:0061448	0.00269025	2.71284	4.67155	12	239	connective tissue development	Hyper	0.00481521
GO:0001704	0.00269598	3.5926	2.37821	8	121	formation of primary germ layer	Hyper	0.00481521
GO:0071840	0.00275465	1.37619	114.291	139	5815	cellular component organization or biogenesis	Hyper	0.00489564
GO:0023057	0.00287206	3.97614	1.88933	7	101	negative regulation of signaling	Hyper	0.00498228
GO:0060572	0.00287279	12.5724	0.294819	3	15	morphogenesis of an epithelial bud	Hyper	0.00498228
GO:0071599	0.00287279	12.5724	0.294819	3	15	otic vesicle development	Hyper	0.00498228
GO:1904862	0.00287279	12.5724	0.294819	3	15	inhibitory synapse assembly	Hyper	0.00498228
GO:1904889	0.00287279	12.5724	0.294819	3	15	regulation of excitatory synapse assembly	Hyper	0.00498228
GO:0048565	0.00298388	3.5297	2.41751	8	123	digestive tract development	Hyper	0.00515006
GO:0071875	0.00303353	7.46596	0.609292	4	31	adrenergic receptor signaling pathway	Hyper	0.0052107
GO:0040007	0.0030716	1.80319	17.5712	30	894	growth	Hyper	0.00525098
GO:0071805	0.00312726	2.80197	4.14712	11	211	potassium ion transmembrane transport	Hyper	0.00531139
GO:0006022	0.00313653	3.49906	2.43717	8	124	aminoglycan metabolic process	Hyper	0.00531139
GO:1903508	0.00334224	1.61022	29.7374	45	1513	positive regulation of nucleic acid-templated transcription	Hyper	0.00560834
GO:0045595	0.00334313	1.70393	22.4298	36	1199	regulation of cell differentiation	Hyper	0.00560834
GO:0001934	0.00339571	1.89746	13.8761	25	706	positive regulation of protein phosphorylation	Hyper	0.00566769
GO:0099173	0.00341009	3.44754	2.47033	8	127	postsynapse organization	Hyper	0.00566769
GO:0001658	0.0034732	5.3709	1.02204	5	52	branching involved in ureteric bud morphogenesis	Hyper	0.00570622
GO:0099558	0.00348467	11.6046	0.314473	3	16	maintenance of synapse structure	Hyper	0.00570622
GO:1905874	0.00348467	11.6046	0.314473	3	16	regulation of postsynaptic density organization	Hyper	0.00570622
GO:0051146	0.00352601	2.50475	5.46398	13	278	striated muscle cell differentiation	Hyper	0.00570622
GO:0050920	0.00360723	2.74637	4.22574	11	215	regulation of chemotaxis	Hyper	0.00570622
GO:0003156	0.00364836	33.7077	0.0975255	2	5	regulation of animal organ formation	Hyper	0.00570622
GO:0060070	0.00367059	3.12118	3.0552	9	158	canonical Wnt signaling pathway	Hyper	0.00570622
GO:0003057	0.00370348	33.4444	0.098273	2	5	regulation of the force of heart contraction by chemical signal	Hyper	0.00570622
GO:0015015	0.00370348	33.4444	0.098273	2	5	heparan sulfate proteoglycan biosynthetic process, enzymatic modification	Hyper	0.00570622
GO:0019800	0.00370348	33.4444	0.098273	2	5	peptide cross-linking via chondroitin 4-sulfate glycosaminoglycan	Hyper	0.00570622
GO:0021855	0.00370348	33.4444	0.098273	2	5	hypothalamus cell migration	Hyper	0.00570622
GO:0021869	0.00370348	33.4444	0.098273	2	5	forebrain ventricular zone progenitor cell division	Hyper	0.00570622
GO:0021873	0.00370348	33.4444	0.098273	2	5	forebrain neuroblast division	Hyper	0.00570622
GO:0048752	0.00370348	33.4444	0.098273	2	5	semicircular canal morphogenesis	Hyper	0.00570622
GO:0060066	0.00370348	33.4444	0.098273	2	5	oviduct development	Hyper	0.00570622
GO:0060664	0.00370348	33.4444	0.098273	2	5	epithelial cell proliferation involved in salivary gland morphogenesis	Hyper	0.00570622
GO:0071866	0.00370348	33.4444	0.098273	2	5	negative regulation of apoptotic process in bone marrow cell	Hyper	0.00570622
GO:0051965	0.00377442	5.2587	1.04169	5	53	positive regulation of synapse assembly	Hyper	0.00579068
GO:0007431	0.00382554	6.95024	0.648602	4	33	salivary gland development	Hyper	0.00584412
GO:0050767	0.00385631	2.30469	6.8398	15	348	regulation of neurogenesis	Hyper	0.00586617
GO:0050806	0.00404775	3.34469	2.5408	8	131	positive regulation of synaptic transmission	Hyper	0.00611634
GO:0048644	0.00405484	4.27321	1.5134	6	77	muscle organ morphogenesis	Hyper	0.00611634
GO:0001710	0.00417033	10.7751	0.334128	3	17	mesodermal cell fate commitment	Hyper	0.00623707
GO:0090092	0.00417278	2.55975	4.9333	12	251	regulation of transmembrane receptor protein serine/threonine kinase signaling pathway	Hyper	0.00623707
GO:0048856	0.004187	2.13369	9.06107	18	656	anatomical structure development	Hyper	0.00623707
GO:0021761	0.00421332	3.69276	2.02442	7	103	limbic system development	Hyper	0.00625033
GO:0071772	0.00425654	3.04723	3.12508	9	159	response to BMP	Hyper	0.00628174
GO:0098810	0.00426949	6.71816	0.668256	4	34	neurotransmitter reuptake	Hyper	0.00628174
GO:0090090	0.00438214	3.29855	2.57475	8	131	negative regulation of canonical Wnt signaling pathway	Hyper	0.00642117
GO:0014068	0.00460153	4.15564	1.55271	6	79	positive regulation of phosphatidylinositol 3-kinase signaling	Hyper	0.00669367
GO:0031325	0.0046054	1.42874	59.8482	79	3045	positive regulation of cellular metabolic process	Hyper	0.00669367
GO:0051961	0.00464325	3.26439	2.5995	8	133	negative regulation of nervous system development	Hyper	0.00672147
GO:0002062	0.00468244	3.61696	2.06373	7	105	chondrocyte differentiation	Hyper	0.00675099
GO:0038179	0.00474692	6.50106	0.687911	4	35	neurotrophin signaling pathway	Hyper	0.00680539
GO:0007165	0.00475809	1.4006	78.6272	99	4277	signal transduction	Hyper	0.00680539
GO:0060538	0.00480781	2.98695	3.18404	9	162	skeletal muscle organ development	Hyper	0.00684922
GO:0046928	0.00489436	4.09923	1.57237	6	80	regulation of neurotransmitter secretion	Hyper	0.00694496
GO:0048640	0.00493127	3.58021	2.08339	7	106	negative regulation of developmental growth	Hyper	0.00696978
GO:0016525	0.00501972	3.21943	2.63372	8	134	negative regulation of angiogenesis	Hyper	0.00706698
GO:0042325	0.00504197	1.6423	23.8017	37	1211	regulation of phosphorylation	Hyper	0.00707058
GO:0070306	0.00525895	6.29753	0.707565	4	36	lens fiber cell differentiation	Hyper	0.00733332
GO:0003008	0.00527019	1.57687	29.7031	44	1594	system process	Hyper	0.00733332
GO:0090287	0.00531114	2.37706	5.73914	13	292	regulation of cellular response to growth factor stimulus	Hyper	0.00734206
GO:0030335	0.00533709	2.21913	7.08898	15	368	positive regulation of cell migration	Hyper	0.00734206
GO:0061138	0.00533782	2.93552	3.23577	9	166	morphogenesis of a branching epithelium	Hyper	0.00734206
GO:0044344	0.00545861	3.5089	2.1227	7	108	cellular response to fibroblast growth factor stimulus	Hyper	0.00734503
GO:0001996	0.0054832	25.0818	0.117928	2	6	positive regulation of heart rate by epinephrine-norepinephrine	Hyper	0.00734503
GO:0021886	0.0054832	25.0818	0.117928	2	6	hypothalamus gonadotrophin-releasing hormone neuron differentiation	Hyper	0.00734503
GO:0032020	0.0054832	25.0818	0.117928	2	6	ISG15-protein conjugation	Hyper	0.00734503
GO:0032229	0.0054832	25.0818	0.117928	2	6	negative regulation of synaptic transmission, GABAergic	Hyper	0.00734503
GO:0051964	0.0054832	25.0818	0.117928	2	6	negative regulation of synapse assembly	Hyper	0.00734503
GO:0098914	0.0054832	25.0818	0.117928	2	6	membrane repolarization during atrial cardiac muscle cell action potential	Hyper	0.00734503
GO:0043954	0.00556632	4.76118	1.13997	5	58	cellular component maintenance	Hyper	0.00742133
GO:0006935	0.0055815	2.20748	7.1246	15	370	chemotaxis	Hyper	0.00742133
GO:0001558	0.00562576	2.14328	7.82253	16	398	regulation of cell growth	Hyper	0.00745258
GO:0060541	0.00570731	2.71814	3.87195	10	197	respiratory system development	Hyper	0.00749853
GO:1901343	0.00572602	3.144	2.69268	8	137	negative regulation of vasculature development	Hyper	0.00749853
GO:0031290	0.00577271	9.42705	0.373437	3	19	retinal ganglion cell axon guidance	Hyper	0.00749853
GO:0048670	0.00577271	9.42705	0.373437	3	19	regulation of collateral sprouting	Hyper	0.00749853
GO:0060039	0.00577271	9.42705	0.373437	3	19	pericardium development	Hyper	0.00749853
GO:0021587	0.00580666	6.10633	0.72722	4	37	cerebellum morphogenesis	Hyper	0.00749853
GO:0098926	0.00580666	6.10633	0.72722	4	37	postsynaptic signal transduction	Hyper	0.00749853
GO:1903510	0.00585504	3.93882	1.63133	6	83	mucopolysaccharide metabolic process	Hyper	0.00753391
GO:0050771	0.00598597	4.67273	1.15962	5	59	negative regulation of axonogenesis	Hyper	0.00764574
GO:0072171	0.00598597	4.67273	1.15962	5	59	mesonephric tubule morphogenesis	Hyper	0.00764574
GO:0021987	0.00602714	3.44035	2.16201	7	110	cerebral cortex development	Hyper	0.00764574
GO:0046660	0.00602714	3.44035	2.16201	7	110	female sex differentiation	Hyper	0.00764574
GO:0043010	0.00609158	3.43063	2.16534	7	115	camera-type eye development	Hyper	0.00770027
GO:0030010	0.00623732	3.09563	2.73199	8	139	establishment of cell polarity	Hyper	0.00785684
GO:0043542	0.0063763	2.41606	5.20847	12	265	endothelial cell migration	Hyper	0.00800382
GO:0072001	0.00642224	2.41363	5.21328	12	268	renal system development	Hyper	0.0080334
GO:0007043	0.00650561	3.07199	2.75164	8	140	cell-cell junction assembly	Hyper	0.00810943
GO:0001708	0.00660638	4.5533	1.18674	5	61	cell fate specification	Hyper	0.00817362
GO:0006816	0.00661359	2.10382	7.96011	16	405	calcium ion transport	Hyper	0.00817362
GO:0014047	0.00669372	8.87199	0.393092	3	20	glutamate secretion	Hyper	0.00817362
GO:0021516	0.00669372	8.87199	0.393092	3	20	dorsal spinal cord development	Hyper	0.00817362
GO:0072111	0.00669372	8.87199	0.393092	3	20	cell proliferation involved in kidney development	Hyper	0.00817362
GO:2000047	0.00669372	8.87199	0.393092	3	20	regulation of cell-cell adhesion mediated by cadherin	Hyper	0.00817362
GO:0009968	0.00690919	1.61686	23.4664	36	1204	negative regulation of signal transduction	Hyper	0.00835907
GO:0045944	0.00691404	1.65185	21.0259	33	1080	positive regulation of transcription by RNA polymerase II	Hyper	0.00835907
GO:0048667	0.00691544	3.34436	2.21722	7	119	cell morphogenesis involved in neuron differentiation	Hyper	0.00835907
GO:0014037	0.00701328	5.75672	0.766529	4	39	Schwann cell differentiation	Hyper	0.00836467
GO:0030501	0.00701328	5.75672	0.766529	4	39	positive regulation of bone mineralization	Hyper	0.00836467
GO:1903524	0.00701328	5.75672	0.766529	4	39	positive regulation of blood circulation	Hyper	0.00836467
GO:2000249	0.00701328	5.75672	0.766529	4	39	regulation of actin cytoskeleton reorganization	Hyper	0.00836467
GO:0043069	0.00707915	1.72247	17.0602	28	868	negative regulation of programmed cell death	Hyper	0.00841528
GO:0042127	0.00710805	1.5295	31.8614	46	1638	regulation of cell population proliferation	Hyper	0.00842175
GO:0048583	0.00731456	1.39072	64.6539	83	3363	regulation of response to stimulus	Hyper	0.00858156
GO:0072359	0.0073347	2.20337	6.65689	14	367	circulatory system development	Hyper	0.00858156
GO:0048514	0.00750756	3.72001	1.71684	6	93	blood vessel morphogenesis	Hyper	0.00858156
GO:0003253	0.00757712	20.0643	0.137582	2	7	cardiac neural crest cell migration involved in outflow tract morphogenesis	Hyper	0.00858156
GO:0031077	0.00757712	20.0643	0.137582	2	7	post-embryonic camera-type eye development	Hyper	0.00858156
GO:0032808	0.00757712	20.0643	0.137582	2	7	lacrimal gland development	Hyper	0.00858156
GO:0035989	0.00757712	20.0643	0.137582	2	7	tendon development	Hyper	0.00858156
GO:0042473	0.00757712	20.0643	0.137582	2	7	outer ear morphogenesis	Hyper	0.00858156
GO:0060437	0.00757712	20.0643	0.137582	2	7	lung growth	Hyper	0.00858156
GO:0061439	0.00757712	20.0643	0.137582	2	7	kidney vasculature morphogenesis	Hyper	0.00858156
GO:0098943	0.00757712	20.0643	0.137582	2	7	neurotransmitter receptor transport, postsynaptic endosome to lysosome	Hyper	0.00858156
GO:2000807	0.00757712	20.0643	0.137582	2	7	regulation of synaptic vesicle clustering	Hyper	0.00858156
GO:0030326	0.00764115	3.2801	2.26028	7	115	embryonic limb morphogenesis	Hyper	0.00858156
GO:0045197	0.00767418	5.59647	0.786184	4	40	establishment or maintenance of epithelial cell apical/basal polarity	Hyper	0.00858156
GO:0048286	0.00767418	5.59647	0.786184	4	40	lung alveolus development	Hyper	0.00858156
GO:0098815	0.00767418	5.59647	0.786184	4	40	modulation of excitatory postsynaptic potential	Hyper	0.00858156
GO:0023019	0.00769711	8.37861	0.412746	3	21	signal transduction involved in regulation of gene expression	Hyper	0.00858156
GO:0051412	0.00769711	8.37861	0.412746	3	21	response to corticosterone	Hyper	0.00858156
GO:2000725	0.00769711	8.37861	0.412746	3	21	regulation of cardiac muscle cell differentiation	Hyper	0.00858156
GO:0099003	0.00780791	3.68974	1.73178	6	90	vesicle-mediated transport in synapse	Hyper	0.00867814
GO:0031345	0.00786446	2.75089	3.43955	9	175	negative regulation of cell projection organization	Hyper	0.00871312
GO:0019229	0.00788792	4.34944	1.23824	5	63	regulation of vasoconstriction	Hyper	0.00871312
GO:0002040	0.00814964	2.73425	3.45921	9	176	sprouting angiogenesis	Hyper	0.00892388
GO:0030323	0.00814964	2.73425	3.45921	9	176	respiratory tube development	Hyper	0.00892388
GO:1902414	0.00817815	3.65278	1.74926	6	89	protein localization to cell junction	Hyper	0.00892388
GO:1990830	0.00817815	3.65278	1.74926	6	89	cellular response to leukemia inhibitory factor	Hyper	0.00892388
GO:0021983	0.00837477	5.44489	0.805838	4	41	pituitary gland development	Hyper	0.00905585
GO:0031952	0.00837477	5.44489	0.805838	4	41	regulation of protein autophosphorylation	Hyper	0.00905585
GO:1902895	0.00837477	5.44489	0.805838	4	41	positive regulation of pri-miRNA transcription by RNA polymerase II	Hyper	0.00905585
GO:0006940	0.00842203	4.27546	1.25789	5	64	regulation of smooth muscle contraction	Hyper	0.00907961
GO:0060548	0.00855304	3.61434	1.76557	6	93	negative regulation of cell death	Hyper	0.00919324
GO:0007409	0.00878317	2.90598	2.89718	8	153	axonogenesis	Hyper	0.00930274
GO:0001759	0.00878448	7.93716	0.432401	3	22	organ induction	Hyper	0.00930274
GO:0006929	0.00878448	7.93716	0.432401	3	22	substrate-dependent cell migration	Hyper	0.00930274
GO:0060713	0.00878448	7.93716	0.432401	3	22	labyrinthine layer morphogenesis	Hyper	0.00930274
GO:0099590	0.00878448	7.93716	0.432401	3	22	neurotransmitter receptor internalization	Hyper	0.00930274
GO:0040012	0.00885516	2.08858	7.51083	15	404	regulation of locomotion	Hyper	0.00932764
GO:0051338	0.00887185	1.70686	16.5688	27	843	regulation of transferase activity	Hyper	0.00932764
GO:0051173	0.00888594	1.3975	55.9959	73	2849	positive regulation of nitrogen compound metabolic process	Hyper	0.00932764
GO:0045766	0.00905254	2.68552	3.51817	9	179	positive regulation of angiogenesis	Hyper	0.00945127
GO:0009888	0.00905637	1.66008	19.0239	30	1042	tissue development	Hyper	0.00945127
GO:0009611	0.0092351	1.89783	10.4562	19	532	response to wounding	Hyper	0.00960986
GO:0030334	0.00929966	2.07572	7.55303	15	402	regulation of cell migration	Hyper	0.00964907
GO:0045666	0.00955946	3.52473	1.80822	6	92	positive regulation of neuron differentiation	Hyper	0.00986162
GO:0070167	0.00955946	3.52473	1.80822	6	92	regulation of biomineral tissue development	Hyper	0.00986162
GO:0021872	0.00970972	5.19524	0.840391	4	43	forebrain generation of neurons	Hyper	0.00997229
GO:0001505	0.00972417	3.12214	2.3663	7	122	regulation of neurotransmitter levels	Hyper	0.00997229
GO:0045664	0.00986656	5.16471	0.84392	4	44	regulation of neuron differentiation	Hyper	0.00997229
GO:0060421	0.00989859	5.16505	0.845147	4	43	positive regulation of heart growth	Hyper	0.00997229
GO:0014051	0.00997229	16.7192	0.157237	2	8	gamma-aminobutyric acid secretion	Hyper	0.00997229
GO:0021826	0.00997229	16.7192	0.157237	2	8	substrate-independent telencephalic tangential migration	Hyper	0.00997229
GO:0021830	0.00997229	16.7192	0.157237	2	8	interneuron migration from the subpallium to the cortex	Hyper	0.00997229
GO:0030916	0.00997229	16.7192	0.157237	2	8	otic vesicle formation	Hyper	0.00997229
GO:0035881	0.00997229	16.7192	0.157237	2	8	amacrine cell differentiation	Hyper	0.00997229
GO:0072239	0.00997229	16.7192	0.157237	2	8	metanephric glomerulus vasculature development	Hyper	0.00997229
GO:0098700	0.00997229	16.7192	0.157237	2	8	neurotransmitter loading into synaptic vesicle	Hyper	0.00997229
GO:0035195	1.70018e-08	6.38233	3.20381	17	568	gene silencing by miRNA	Hypo	1.14619e-06
GO:0016441	2.25216e-08	6.25325	3.26586	17	579	posttranscriptional gene silencing	Hypo	1.14619e-06
GO:0050864	2.4738e-08	15.6533	0.676862	9	120	regulation of B cell activation	Hypo	1.14619e-06
GO:0031047	3.97319e-08	5.99904	3.39559	17	602	gene silencing by RNA	Hypo	1.38069e-06
GO:0050728	5.06678e-06	9.45718	0.953248	8	169	negative regulation of inflammatory response	Hypo	0.000140857
GO:0050670	3.22055e-05	7.22953	1.22963	8	218	regulation of lymphocyte proliferation	Hypo	0.000669248
GO:0050851	3.37031e-05	8.61503	0.902483	7	160	antigen receptor-mediated signaling pathway	Hypo	0.000669248
GO:0007204	5.62328e-05	5.80605	1.72036	9	305	positive regulation of cytosolic calcium ion concentration	Hypo	0.000925753
GO:0070663	5.99408e-05	6.59306	1.34244	8	238	regulation of leukocyte proliferation	Hypo	0.000925753
GO:0033003	6.7237e-05	20.9708	0.21998	4	39	regulation of mast cell activation	Hypo	0.000934594
GO:0006955	8.19742e-05	3.30256	6.01687	17	1156	immune response	Hypo	0.00103586
GO:0030889	9.2365e-05	41.9484	0.0902483	3	16	negative regulation of B cell proliferation	Hypo	0.00106989
GO:0030183	0.000115237	8.67416	0.76147	6	135	B cell differentiation	Hypo	0.00119574
GO:0001818	0.000120434	5.22963	1.90085	9	337	negative regulation of cytokine production	Hypo	0.00119574
GO:0031347	0.000134611	3.97848	3.37303	12	598	regulation of defense response	Hypo	0.0012474
GO:0006935	0.000148719	4.60241	2.41594	10	448	chemotaxis	Hypo	0.00127216
GO:0006874	0.000155588	4.56486	2.42542	10	430	cellular calcium ion homeostasis	Hypo	0.00127216
GO:0032101	0.000178708	3.29268	5.16107	15	915	regulation of response to external stimulus	Hypo	0.00132003
GO:0002757	0.000180436	6.50638	1.17887	7	209	immune response-activating signal transduction	Hypo	0.00132003
GO:1904035	0.000199663	10.2717	0.535849	5	95	regulation of epithelial cell apoptotic process	Hypo	0.00132158
GO:1990868	0.000199663	10.2717	0.535849	5	95	response to chemokine	Hypo	0.00132158
GO:0050855	0.000283853	27.2553	0.129732	3	23	regulation of B cell receptor signaling pathway	Hypo	0.00175795
GO:0002699	0.000290883	5.99528	1.27476	7	226	positive regulation of immune effector process	Hypo	0.00175795
GO:0032665	0.000311428	119.979	0.0282026	2	5	regulation of interleukin-21 production	Hypo	0.00180369
GO:0002768	0.000349801	5.80718	1.31424	7	233	immune response-regulating cell surface receptor signaling pathway	Hypo	0.0019449
GO:0050778	0.000387488	4.04929	2.71873	10	482	positive regulation of immune response	Hypo	0.00207157
GO:0072507	0.00042701	3.99702	2.75257	10	488	divalent inorganic cation homeostasis	Hypo	0.00219831
GO:0002520	0.000496879	3.09415	5.06519	14	898	immune system development	Hypo	0.00238361
GO:0055082	0.000513407	3.22942	4.48421	13	795	cellular chemical homeostasis	Hypo	0.00238361
GO:0043304	0.000514449	21.7979	0.157935	3	28	regulation of mast cell degranulation	Hypo	0.00238361
GO:0030003	0.000685245	3.4933	3.46892	11	615	cellular cation homeostasis	Hypo	0.00307255
GO:0065007	0.000741117	2.3038	66.7443	81	11833	biological regulation	Hypo	0.00316002
GO:0030155	0.000750219	3.25421	4.0781	12	723	regulation of cell adhesion	Hypo	0.00316002
GO:0048585	0.000826742	2.51164	8.65747	19	1566	negative regulation of response to stimulus	Hypo	0.00332987
GO:0036336	0.000839473	18.1596	0.186137	3	33	dendritic cell migration	Hypo	0.00332987
GO:1903243	0.000862414	59.9789	0.0451241	2	8	negative regulation of cardiac muscle hypertrophy in response to stress	Hypo	0.00332987
GO:0002312	0.000894357	10.172	0.428679	4	76	B cell activation involved in immune response	Hypo	0.00335988
GO:0032946	0.000968037	7.1499	0.75583	5	134	positive regulation of mononuclear cell proliferation	Hypo	0.00354098
GO:0050801	0.0010431	3.12556	4.23603	12	751	ion homeostasis	Hypo	0.00354558
GO:0010629	0.00104961	2.86773	5.49087	14	1052	negative regulation of gene expression	Hypo	0.00354558
GO:0050921	0.00106891	6.98617	0.772751	5	137	positive regulation of chemotaxis	Hypo	0.00354558
GO:0050866	0.00107133	5.59976	1.15631	6	205	negative regulation of cell activation	Hypo	0.00354558
GO:2000553	0.00110474	51.4075	0.0507647	2	9	positive regulation of T-helper 2 cell cytokine production	Hypo	0.00357115
GO:0002694	0.00115294	3.78305	2.59628	9	479	regulation of leukocyte activation	Hypo	0.00363304
GO:1904706	0.00117617	16.0194	0.208699	3	37	negative regulation of vascular associated smooth muscle cell proliferation	Hypo	0.00363304
GO:0097530	0.00125409	6.72921	0.800954	5	142	granulocyte migration	Hypo	0.0037264
GO:0006952	0.00129063	2.92538	4.98253	13	973	defense response	Hypo	0.0037264
GO:0070098	0.00130716	9.13527	0.474529	4	85	chemokine-mediated signaling pathway	Hypo	0.0037264
GO:0042592	0.00131362	2.35141	9.70733	20	1721	homeostatic process	Hypo	0.0037264
GO:0032733	0.00137216	15.1277	0.21998	3	39	positive regulation of interleukin-10 production	Hypo	0.00374989
GO:2000510	0.00137586	44.9789	0.0564052	2	10	positive regulation of dendritic cell chemotaxis	Hypo	0.00374989
GO:0032735	0.00147739	14.7179	0.225621	3	40	positive regulation of interleukin-12 production	Hypo	0.00394917
GO:0030890	0.00158755	14.3298	0.231261	3	41	positive regulation of B cell proliferation	Hypo	0.00416356
GO:0034163	0.00167543	39.9789	0.0620457	2	11	regulation of toll-like receptor 9 signaling pathway	Hypo	0.00423427
GO:2000668	0.00167543	39.9789	0.0620457	2	11	regulation of dendritic cell apoptotic process	Hypo	0.00423427
GO:0051250	0.00174384	6.22503	0.862999	5	153	negative regulation of lymphocyte activation	Hypo	0.00432847
GO:0030097	0.00189901	2.89927	4.54626	12	806	hemopoiesis	Hypo	0.00452366
GO:0031294	0.00194843	13.2789	0.248183	3	44	lymphocyte costimulation	Hypo	0.00452366
GO:0097028	0.00194843	13.2789	0.248183	3	44	dendritic cell differentiation	Hypo	0.00452366
GO:0002700	0.00195266	6.05978	0.885561	5	157	regulation of production of molecular mediator of immune response	Hypo	0.00452366
GO:0031053	0.00200314	35.9789	0.0676862	2	12	primary miRNA processing	Hypo	0.00456453
GO:0002279	0.00221515	12.6598	0.259464	3	46	mast cell activation involved in immune response	Hypo	0.00488739
GO:0002673	0.00221515	12.6598	0.259464	3	46	regulation of acute inflammatory response	Hypo	0.00488739
GO:0030162	0.00234046	2.97012	4.04425	11	717	regulation of proteolysis	Hypo	0.00493307
GO:0002448	0.00235658	12.3714	0.265104	3	47	mast cell mediated immunity	Hypo	0.00493307
GO:0014745	0.00235867	32.7062	0.0733267	2	13	negative regulation of muscle adaptation	Hypo	0.00493307
GO:0030593	0.00237781	7.69892	0.558411	4	99	neutrophil chemotaxis	Hypo	0.00493307
GO:0002639	0.00250348	12.0957	0.270745	3	48	positive regulation of immunoglobulin production	Hypo	0.00503911
GO:0006953	0.00250348	12.0957	0.270745	3	48	acute-phase response	Hypo	0.00503911
GO:0050673	0.00253768	3.64996	2.36338	8	419	epithelial cell proliferation	Hypo	0.00503911
GO:0002683	0.00261303	3.63185	2.37466	8	421	negative regulation of immune system process	Hypo	0.00511565
GO:0048660	0.00268906	5.61241	0.953248	5	169	regulation of smooth muscle cell proliferation	Hypo	0.00519138
GO:0055065	0.00281051	3.07066	3.53661	10	627	metal ion homeostasis	Hypo	0.00535152
GO:0009892	0.00287828	1.93454	18.2978	30	3244	negative regulation of metabolic process	Hypo	0.0054065
GO:0043207	0.0029785	2.37699	7.49061	16	1328	response to external biotic stimulus	Hypo	0.00552016
GO:0032651	0.00304537	7.16762	0.597895	4	106	regulation of interleukin-1 beta production	Hypo	0.00556982
GO:0016477	0.0031825	2.30047	8.25208	17	1463	cell migration	Hypo	0.00574504
GO:1903555	0.00352456	5.25621	1.01529	5	180	regulation of tumor necrosis factor superfamily cytokine production	Hypo	0.00628095
GO:0045599	0.00369088	10.4632	0.310229	3	55	negative regulation of fat cell differentiation	Hypo	0.00649408
GO:0071675	0.00383091	6.70455	0.637379	4	113	regulation of mononuclear cell migration	Hypo	0.00665621
GO:0002366	0.00388349	4.28724	1.49474	6	265	leukocyte activation involved in immune response	Hypo	0.00666425
GO:0010612	0.0040526	23.9789	0.0958888	2	17	regulation of cardiac muscle adaptation	Hypo	0.00673973
GO:0060546	0.0040526	23.9789	0.0958888	2	17	negative regulation of necroptotic process	Hypo	0.00673973
GO:0009615	0.00407293	3.72222	2.01367	7	357	response to virus	Hypo	0.00673973
GO:1903131	0.0041552	3.71115	2.02215	7	369	mononuclear cell differentiation	Hypo	0.00679498
GO:0051674	0.00432748	2.17722	9.23917	18	1638	localization of cell	Hypo	0.00699442
GO:0002688	0.00446938	6.4086	0.665581	4	118	regulation of leukocyte chemotaxis	Hypo	0.00714074
GO:0035743	0.00454249	22.4789	0.101529	2	18	CD4-positive, alpha-beta T cell cytokine production	Hypo	0.00717507
GO:0071674	0.00476411	9.50393	0.339563	3	63	mononuclear cell migration	Hypo	0.00727369
GO:0043410	0.00494789	3.25159	2.63976	8	468	positive regulation of MAPK cascade	Hypo	0.00727369
GO:0040011	0.00527687	2.09127	10.1699	19	1803	locomotion	Hypo	0.00727369
GO:0048247	0.00540845	9.06383	0.355353	3	63	lymphocyte chemotaxis	Hypo	0.00727369
GO:0030277	0.00559981	19.9789	0.11281	2	20	maintenance of gastrointestinal epithelium	Hypo	0.00727369
GO:1904753	0.00559981	19.9789	0.11281	2	20	negative regulation of vascular associated smooth muscle cell migration	Hypo	0.00727369
GO:0003350	0.00564052	Inf	0.00564052	1	1	pulmonary myocardium development	Hypo	0.00727369
GO:0007499	0.00564052	Inf	0.00564052	1	1	ectoderm and mesoderm interaction	Hypo	0.00727369
GO:0012502	0.00564052	Inf	0.00564052	1	1	induction of programmed cell death	Hypo	0.00727369
GO:0019310	0.00564052	Inf	0.00564052	1	1	inositol catabolic process	Hypo	0.00727369
GO:0035611	0.00564052	Inf	0.00564052	1	1	protein branching point deglutamylation	Hypo	0.00727369
GO:0038115	0.00564052	Inf	0.00564052	1	1	chemokine (C-C motif) ligand 19 signaling pathway	Hypo	0.00727369
GO:0061767	0.00564052	Inf	0.00564052	1	1	negative regulation of lung blood pressure	Hypo	0.00727369
GO:0106108	0.00564052	Inf	0.00564052	1	1	negative regulation of (R)-mevalonic acid biosynthetic process	Hypo	0.00727369
GO:1901735	0.00564052	Inf	0.00564052	1	1	(R)-mevalonic acid metabolic process	Hypo	0.00727369
GO:1904156	0.00564052	Inf	0.00564052	1	1	DN3 thymocyte differentiation	Hypo	0.00727369
GO:2000522	0.00564052	Inf	0.00564052	1	1	positive regulation of immunological synapse formation	Hypo	0.00727369
GO:2000526	0.00564052	Inf	0.00564052	1	1	positive regulation of glycoprotein biosynthetic process involved in immunological synapse formation	Hypo	0.00727369
GO:2001216	0.00564052	Inf	0.00564052	1	1	negative regulation of hydroxymethylglutaryl-CoA reductase (NADPH) activity	Hypo	0.00727369
GO:0002720	0.0056515	8.91472	0.360993	3	64	positive regulation of cytokine production involved in immune response	Hypo	0.00727369
GO:0045667	0.00579256	5.93653	0.716346	4	127	regulation of osteoblast differentiation	Hypo	0.00738684
GO:0042113	0.00599326	19.119	0.116559	2	23	B cell activation	Hypo	0.00751898
GO:0042454	0.00616665	18.9263	0.118451	2	21	ribonucleoside catabolic process	Hypo	0.00751898
GO:0060547	0.00616665	18.9263	0.118451	2	21	negative regulation of necrotic cell death	Hypo	0.00751898
GO:0071636	0.00616665	18.9263	0.118451	2	21	positive regulation of transforming growth factor beta production	Hypo	0.00751898
GO:1903589	0.00616665	18.9263	0.118451	2	21	positive regulation of blood vessel endothelial cell proliferation involved in sprouting angiogenesis	Hypo	0.00751898
GO:0030595	0.00628138	8.56288	0.374912	3	71	leukocyte chemotaxis	Hypo	0.00759228
GO:0002687	0.00645628	5.7482	0.738908	4	131	positive regulation of leukocyte migration	Hypo	0.0077364
GO:0007596	0.00673182	4.47906	1.18451	5	210	blood coagulation	Hypo	0.00799763
GO:0043299	0.0069646	8.23694	0.389196	3	69	leukocyte degranulation	Hypo	0.00820407
GO:0070372	0.00703706	3.76901	1.69216	6	300	regulation of ERK1 and ERK2 cascade	Hypo	0.00821976
GO:2000353	0.00737516	17.1218	0.129732	2	23	positive regulation of endothelial cell apoptotic process	Hypo	0.0085198
GO:0002703	0.00741651	4.37112	1.21271	5	215	regulation of leukocyte mediated immunity	Hypo	0.0085198
GO:0032732	0.00753628	7.99374	0.400477	3	71	positive regulation of interleukin-1 production	Hypo	0.00858642
GO:0002274	0.00770354	4.32937	1.22399	5	217	myeloid leukocyte activation	Hypo	0.00870562
GO:0032418	0.00783222	7.87743	0.406117	3	72	lysosome localization	Hypo	0.00870943
GO:0090049	0.00783222	7.87743	0.406117	3	72	regulation of cell migration involved in sprouting angiogenesis	Hypo	0.00870943
GO:0050729	0.00793128	5.40502	0.784032	4	139	positive regulation of inflammatory response	Hypo	0.00874958
GO:0007165	0.00805163	1.68262	31.2259	43	5536	signal transduction	Hypo	0.00878024
GO:0032720	0.00813495	7.76444	0.411758	3	73	negative regulation of tumor necrosis factor production	Hypo	0.00878024
GO:0044419	0.00814856	2.1176	8.31977	16	1475	biological process involved in interspecies interaction between organisms	Hypo	0.00878024
GO:0032943	0.00822602	5.34901	0.792592	4	147	mononuclear cell proliferation	Hypo	0.00879552
GO:0045321	0.00860103	5.28627	0.803582	4	160	leukocyte activation	Hypo	0.00907171
GO:0090330	0.00868153	15.6311	0.141013	2	25	regulation of platelet aggregation	Hypo	0.00907171
GO:1903055	0.00868153	15.6311	0.141013	2	25	positive regulation of extracellular matrix organization	Hypo	0.00907171
GO:0071456	0.00874539	5.24824	0.806594	4	143	cellular response to hypoxia	Hypo	0.00907171
GO:0052548	0.00906047	3.18203	2.34082	7	415	regulation of endopeptidase activity	Hypo	0.00928456
GO:0006919	0.00908418	7.44404	0.428679	3	76	activation of cysteine-type endopeptidase activity involved in apoptotic process	Hypo	0.00928456
GO:0071624	0.00937069	14.9789	0.146653	2	26	positive regulation of granulocyte chemotaxis	Hypo	0.00950749
GO:0098662	0.00958198	2.54476	4.22475	10	749	inorganic cation transmembrane transport	Hypo	0.00959824
GO:0006928	0.00959824	1.93038	11.5518	20	2048	movement of cell or subcellular component	Hypo	0.00959824

## Sheet: CS2.promotersMethylation.GOenrichment
GOBPID	Pvalue	OddsRatio	ExpCount	Count	Size	Term	Meth_direction	p.adjusted
GO:1903131	5.63572e-12	10.2901	2.20946	18	413	mononuclear cell differentiation	Hyper	1.06515e-09
GO:0002250	7.32249e-10	11.8071	1.33697	13	265	adaptive immune response	Hyper	6.91975e-08
GO:0030097	1.1572e-09	6.1491	4.31191	21	806	hemopoiesis	Hyper	7.29038e-08
GO:0050776	4.63076e-09	5.92508	4.20492	20	786	regulation of immune response	Hyper	2.18804e-07
GO:0002429	1.49294e-08	11.596	1.1181	11	209	immune response-activating cell surface receptor signaling pathway	Hyper	5.64331e-07
GO:0070663	5.68048e-08	10.0972	1.27325	11	238	regulation of leukocyte proliferation	Hyper	1.78935e-06
GO:0030183	6.90555e-08	17.3286	0.543336	8	106	B cell differentiation	Hyper	1.8645e-06
GO:0045321	1.09505e-07	10.9943	1.07171	10	228	leukocyte activation	Hyper	2.58705e-06
GO:0002520	1.68597e-07	5.15843	4.24945	18	827	immune system development	Hyper	3.54054e-06
GO:0002263	1.96167e-07	8.86769	1.43909	11	269	cell activation involved in immune response	Hyper	3.70756e-06
GO:0050670	2.5404e-07	9.90678	1.16625	10	218	regulation of lymphocyte proliferation	Hyper	4.36486e-06
GO:0023052	3.24742e-07	2.91709	32.1254	56	6005	signaling	Hyper	5.11469e-06
GO:0002253	3.87933e-07	8.25012	1.54073	11	288	activation of immune response	Hyper	5.63995e-06
GO:0007154	4.46054e-07	2.87907	32.3982	56	6056	cell communication	Hyper	6.02173e-06
GO:0051251	2.48243e-06	7.60388	1.49794	10	280	positive regulation of lymphocyte activation	Hyper	3.12786e-05
GO:0032946	7.52638e-06	11.0094	0.716869	7	134	positive regulation of mononuclear cell proliferation	Hyper	8.51912e-05
GO:0044419	7.6627e-06	3.38555	7.89091	22	1475	biological process involved in interspecies interaction between organisms	Hyper	8.51912e-05
GO:0050867	1.23725e-05	6.27675	1.79752	10	336	positive regulation of cell activation	Hyper	0.000129912
GO:0042330	1.43348e-05	4.73065	3.14566	13	588	taxis	Hyper	0.000142593
GO:0043207	1.89773e-05	3.35478	7.10449	20	1328	response to external biotic stimulus	Hyper	0.000175061
GO:0050920	1.98196e-05	7.77456	1.1502	8	215	regulation of chemotaxis	Hyper	0.000175061
GO:0022407	2.03775e-05	5.34274	2.32715	11	435	regulation of cell-cell adhesion	Hyper	0.000175061
GO:0002706	2.29472e-05	9.18506	0.850613	7	159	regulation of lymphocyte mediated immunity	Hyper	0.000188566
GO:0007166	2.71288e-05	2.97163	10.7156	25	2301	cell surface receptor signaling pathway	Hyper	0.000213639
GO:0051716	5.54054e-05	2.30792	37.1435	56	6943	cellular response to stimulus	Hyper	0.000418865
GO:0030890	6.67575e-05	20.9681	0.219341	4	41	positive regulation of B cell proliferation	Hyper	0.000485275
GO:0030889	7.88942e-05	44.3181	0.0855963	3	16	negative regulation of B cell proliferation	Hyper	0.000534769
GO:0034113	8.14293e-05	19.8267	0.230487	4	44	heterotypic cell-cell adhesion	Hyper	0.000534769
GO:0001776	8.20545e-05	12.5457	0.444031	5	83	leukocyte homeostasis	Hyper	0.000534769
GO:0045785	9.22683e-05	4.89241	2.279	10	426	positive regulation of cell adhesion	Hyper	0.00058129
GO:0002684	9.74319e-05	4.47938	2.77792	11	568	positive regulation of immune system process	Hyper	0.00059402
GO:0050864	0.000103746	11.9039	0.466449	5	91	regulation of B cell activation	Hyper	0.000612748
GO:0032103	0.000110645	6.03177	1.46899	8	285	positive regulation of response to external stimulus	Hyper	0.000618301
GO:0048513	0.000111229	2.38715	17.5472	33	3280	animal organ development	Hyper	0.000618301
GO:0002639	0.000124654	17.625	0.256789	4	48	positive regulation of immunoglobulin production	Hyper	0.000673133
GO:0006950	0.000133057	2.32307	19.318	35	3611	response to stress	Hyper	0.000698547
GO:0002443	0.000142397	6.79219	1.13656	7	223	leukocyte mediated immunity	Hyper	0.000727381
GO:0042102	0.000171735	10.6278	0.518928	5	97	positive regulation of T cell proliferation	Hyper	0.000854154
GO:0022610	0.000182219	2.87935	7.68762	19	1437	biological adhesion	Hyper	0.000883061
GO:0002700	0.000196483	7.83336	0.839914	6	157	regulation of production of molecular mediator of immune response	Hyper	0.000924682
GO:0046651	0.000200592	15.4222	0.28977	4	60	lymphocyte proliferation	Hyper	0.000924682
GO:1903039	0.00023964	6.20625	1.2358	7	231	positive regulation of leukocyte cell-cell adhesion	Hyper	0.0010673
GO:0050855	0.000242824	28.7949	0.123045	3	23	regulation of B cell receptor signaling pathway	Hyper	0.0010673
GO:0006959	0.000266039	6.09592	1.2572	7	235	humoral immune response	Hyper	0.00114276
GO:0002694	0.000301845	4.61566	2.15681	9	424	regulation of leukocyte activation	Hyper	0.00122932
GO:1904892	0.000308842	9.30487	0.588475	5	110	regulation of receptor signaling pathway via STAT	Hyper	0.00122932
GO:0050863	0.000315986	5.12607	1.71193	8	320	regulation of T cell activation	Hyper	0.00122932
GO:0032715	0.00031706	13.5949	0.326336	4	61	negative regulation of interleukin-6 production	Hyper	0.00122932
GO:0002286	0.000322057	9.21655	0.593825	5	111	T cell activation involved in immune response	Hyper	0.00122932
GO:0002377	0.000325216	13.4929	0.328416	4	64	immunoglobulin production	Hyper	0.00122932
GO:0070661	0.000348499	13.2326	0.334336	4	70	leukocyte proliferation	Hyper	0.00127128
GO:0071675	0.000349769	9.04481	0.604524	5	113	regulation of mononuclear cell migration	Hyper	0.00127128
GO:0002322	0.000418766	95.0056	0.0320986	2	6	B cell proliferation involved in immune response	Hyper	0.00146568
GO:0002676	0.000418766	95.0056	0.0320986	2	6	regulation of chronic inflammatory response	Hyper	0.00146568
GO:0043304	0.000440566	23.0292	0.149794	3	28	regulation of mast cell degranulation	Hyper	0.00151394
GO:1904019	0.000461171	8.49075	0.641972	5	120	epithelial cell apoptotic process	Hyper	0.00155645
GO:0001782	0.000489503	22.1422	0.155143	3	29	B cell homeostasis	Hyper	0.00162309
GO:0043299	0.000508408	11.9161	0.369134	4	69	leukocyte degranulation	Hyper	0.00165671
GO:0002200	0.000566782	11.559	0.379834	4	71	somatic diversification of immune receptors	Hyper	0.001793
GO:0016064	0.000576323	8.06688	0.674071	5	126	immunoglobulin mediated immune response	Hyper	0.001793
GO:0002285	0.000578692	11.4902	0.381892	4	75	lymphocyte activation involved in immune response	Hyper	0.001793
GO:0002705	0.000597437	8.00028	0.679421	5	127	positive regulation of leukocyte mediated immunity	Hyper	0.00180002
GO:0002376	0.000600006	3.65847	3.48163	11	879	immune system process	Hyper	0.00180002
GO:0042113	0.000647032	19.8494	0.169925	3	37	B cell activation	Hyper	0.00190718
GO:0050853	0.000655908	19.8314	0.171014	3	33	B cell receptor signaling pathway	Hyper	0.00190718
GO:0071674	0.000671611	11.0212	0.397214	4	78	mononuclear cell migration	Hyper	0.00192325
GO:0030154	0.000751704	2.07768	21.062	35	3937	cell differentiation	Hyper	0.00212048
GO:0006954	0.000805701	3.23489	4.11932	12	770	inflammatory response	Hyper	0.00222405
GO:0050866	0.000811955	5.92708	1.0967	6	205	negative regulation of cell activation	Hyper	0.00222405
GO:0001910	0.000848404	10.3212	0.422632	4	79	regulation of leukocyte mediated cytotoxicity	Hyper	0.00229069
GO:0042092	0.000930967	17.4382	0.192592	3	36	type 2 immune response	Hyper	0.00247821
GO:0097530	0.000988927	7.11805	0.759667	5	142	granulocyte migration	Hyper	0.002575
GO:2000553	0.000994575	54.2794	0.0481479	2	9	positive regulation of T-helper 2 cell cytokine production	Hyper	0.002575
GO:0051240	0.00107549	2.58285	7.47363	17	1397	positive regulation of multicellular organismal process	Hyper	0.00274686
GO:0034109	0.00116548	9.43625	0.46008	4	86	homotypic cell-cell adhesion	Hyper	0.00281799
GO:0070098	0.00116548	9.43625	0.46008	4	86	chemokine-mediated signaling pathway	Hyper	0.00281799
GO:0002251	0.00117789	15.9822	0.208641	3	39	organ or tissue specific immune response	Hyper	0.00281799
GO:0032733	0.00117789	15.9822	0.208641	3	39	positive regulation of interleukin-10 production	Hyper	0.00281799
GO:0033003	0.00117789	15.9822	0.208641	3	39	regulation of mast cell activation	Hyper	0.00281799
GO:0050829	0.0012167	9.32202	0.46543	4	87	defense response to Gram-negative bacterium	Hyper	0.00287445
GO:0045348	0.00123889	47.4917	0.0534977	2	10	positive regulation of MHC class II biosynthetic process	Hyper	0.00289075
GO:0031347	0.00133417	3.42563	3.19916	10	598	regulation of defense response	Hyper	0.00304955
GO:1902107	0.00133922	6.62992	0.813165	5	152	positive regulation of leukocyte differentiation	Hyper	0.00304955
GO:0051250	0.00137869	6.58473	0.818515	5	153	negative regulation of lymphocyte activation	Hyper	0.00310206
GO:0001974	0.00146258	14.7502	0.22469	3	42	blood vessel remodeling	Hyper	0.00321429
GO:0031295	0.00146258	14.7502	0.22469	3	42	T cell costimulation	Hyper	0.00321429
GO:0034163	0.00150894	42.2123	0.0588475	2	11	regulation of toll-like receptor 9 signaling pathway	Hyper	0.00324078
GO:0045657	0.00150894	42.2123	0.0588475	2	11	positive regulation of monocyte differentiation	Hyper	0.00324078
GO:0045087	0.00156494	3.3559	3.273	10	635	innate immune response	Hyper	0.00328908
GO:0046427	0.00156623	14.3806	0.23004	3	43	positive regulation of receptor signaling pathway via JAK-STAT	Hyper	0.00328908
GO:0002699	0.00163943	8.56715	0.504569	4	99	positive regulation of immune effector process	Hyper	0.00338064
GO:0032102	0.00165369	4.4163	1.71534	7	330	negative regulation of response to external stimulus	Hyper	0.00338064
GO:2000026	0.00166349	2.54047	7.08845	16	1325	regulation of multicellular organismal development	Hyper	0.00338064
GO:1990868	0.0016846	8.4985	0.508228	4	95	response to chemokine	Hyper	0.00338712
GO:0032661	0.00180443	37.9889	0.0641972	2	12	regulation of interleukin-18 production	Hyper	0.00358986
GO:0002208	0.00190438	13.375	0.246089	3	46	somatic diversification of immunoglobulins involved in immune response	Hyper	0.00365877
GO:0002279	0.00190438	13.375	0.246089	3	46	mast cell activation involved in immune response	Hyper	0.00365877
GO:0045190	0.00190438	13.375	0.246089	3	46	isotype switching	Hyper	0.00365877
GO:0009617	0.0019165	3.25341	3.35966	10	628	response to bacterium	Hyper	0.00365877
GO:0002448	0.0020264	13.0702	0.251439	3	47	mast cell mediated immunity	Hyper	0.0038299
GO:0045579	0.00212509	34.5333	0.069547	2	13	positive regulation of B cell differentiation	Hyper	0.00397666
GO:0045058	0.00228479	12.5005	0.262139	3	49	T cell selection	Hyper	0.00423359
GO:0048870	0.00238544	2.32508	8.76292	18	1638	cell motility	Hyper	0.00437716
GO:1900047	0.00242129	12.2338	0.267489	3	50	negative regulation of hemostasis	Hyper	0.00440023
GO:1901857	0.00247066	31.6537	0.0748968	2	14	positive regulation of cellular respiration	Hyper	0.00444084
GO:0002698	0.00251413	7.57709	0.567076	4	106	negative regulation of immune effector process	Hyper	0.00444084
GO:0002821	0.00251413	7.57709	0.567076	4	106	positive regulation of adaptive immune response	Hyper	0.00444084
GO:0002711	0.00270919	11.7331	0.278188	3	52	positive regulation of T cell mediated immunity	Hyper	0.00471231
GO:0051607	0.00271768	4.62855	1.39094	6	260	defense response to virus	Hyper	0.00471231
GO:2000402	0.00284086	29.2171	0.0802466	2	15	negative regulation of lymphocyte migration	Hyper	0.00485135
GO:0050819	0.00286072	11.4978	0.283538	3	53	negative regulation of coagulation	Hyper	0.00485135
GO:0071347	0.00287487	7.28945	0.588475	4	110	cellular response to interleukin-1	Hyper	0.00485135
GO:0016447	0.00301737	11.2716	0.288888	3	54	somatic recombination of immunoglobulin gene segments	Hyper	0.00504674
GO:0042327	0.00305999	2.86924	4.19422	11	784	positive regulation of phosphorylation	Hyper	0.00507315
GO:0045577	0.00310347	27.7273	0.0837989	2	16	regulation of B cell differentiation	Hyper	0.00510048
GO:0034116	0.00323543	27.1286	0.0855963	2	16	positive regulation of heterotypic cell-cell adhesion	Hyper	0.00527152
GO:0007186	0.00347552	2.48787	6.23248	14	1165	G protein-coupled receptor signaling pathway	Hyper	0.0056143
GO:0002820	0.00351861	10.6436	0.304937	3	57	negative regulation of adaptive immune response	Hyper	0.0056227
GO:0030595	0.00354022	6.86626	0.623735	4	124	leukocyte chemotaxis	Hyper	0.0056227
GO:0050789	0.00369347	1.95909	59.6446	72	11149	regulation of biological process	Hyper	0.00573153
GO:2000351	0.0036963	10.4494	0.310287	3	58	regulation of endothelial cell apoptotic process	Hyper	0.00573153
GO:0050852	0.00369972	6.77472	0.631273	4	118	T cell receptor signaling pathway	Hyper	0.00573153
GO:0030168	0.00381297	6.71542	0.636623	4	119	platelet activation	Hyper	0.00585895
GO:0043030	0.00387938	10.2622	0.315636	3	59	regulation of macrophage activation	Hyper	0.00591293
GO:0008284	0.00404931	2.63281	4.99669	12	934	positive regulation of cell population proliferation	Hyper	0.006002
GO:0098542	0.00407767	5.09532	1.05341	5	222	defense response to other organism	Hyper	0.006002
GO:0002902	0.0040966	23.7347	0.0962959	2	18	regulation of B cell apoptotic process	Hyper	0.006002
GO:0035743	0.0040966	23.7347	0.0962959	2	18	CD4-positive, alpha-beta T cell cytokine production	Hyper	0.006002
GO:0150079	0.0040966	23.7347	0.0962959	2	18	negative regulation of neuroinflammatory response	Hyper	0.006002
GO:0031401	0.00415422	2.62378	5.01273	12	937	positive regulation of protein modification process	Hyper	0.00603959
GO:0031343	0.00426191	9.90721	0.326336	3	61	positive regulation of cell killing	Hyper	0.00614886
GO:0045089	0.00441461	6.43371	0.663372	4	124	positive regulation of innate immune response	Hyper	0.00632092
GO:0072678	0.00446145	9.73872	0.331686	3	62	T cell migration	Hyper	0.00633996
GO:1900373	0.00456268	22.3373	0.101646	2	19	positive regulation of purine nucleotide biosynthetic process	Hyper	0.00643542
GO:0016444	0.00466658	9.57584	0.337036	3	63	somatic cell DNA recombination	Hyper	0.00653321
GO:0045637	0.00477669	4.88246	1.09135	5	204	regulation of myeloid cell differentiation	Hyper	0.00661545
GO:1903305	0.00480472	6.27568	0.679421	4	127	regulation of regulated secretory pathway	Hyper	0.00661545
GO:0002720	0.00487733	9.41831	0.342385	3	64	positive regulation of cytokine production involved in immune response	Hyper	0.00661545
GO:2000514	0.00487733	9.41831	0.342385	3	64	regulation of CD4-positive, alpha-beta T cell activation	Hyper	0.00661545
GO:0048584	0.00490033	4.11343	1.57625	6	336	positive regulation of response to stimulus	Hyper	0.00661545
GO:0051174	0.00495116	2.31245	7.19009	15	1344	regulation of phosphorus metabolic process	Hyper	0.00663085
GO:0002690	0.00502104	9.31472	0.345932	3	66	positive regulation of leukocyte chemotaxis	Hyper	0.00663085
GO:0033141	0.00505207	21.0951	0.106995	2	20	positive regulation of peptidyl-serine phosphorylation of STAT protein	Hyper	0.00663085
GO:0098543	0.00505207	21.0951	0.106995	2	20	detection of other organism	Hyper	0.00663085
GO:0030193	0.00531587	9.11825	0.353085	3	66	regulation of blood coagulation	Hyper	0.00665202
GO:0002875	0.00534977	Inf	0.00534977	1	1	negative regulation of chronic inflammatory response to antigenic stimulus	Hyper	0.00665202
GO:0003350	0.00534977	Inf	0.00534977	1	1	pulmonary myocardium development	Hyper	0.00665202
GO:0061514	0.00534977	Inf	0.00534977	1	1	interleukin-34-mediated signaling pathway	Hyper	0.00665202
GO:0071412	0.00534977	Inf	0.00534977	1	1	cellular response to genistein	Hyper	0.00665202
GO:1900280	0.00534977	Inf	0.00534977	1	1	negative regulation of CD4-positive, alpha-beta T cell costimulation	Hyper	0.00665202
GO:1904156	0.00534977	Inf	0.00534977	1	1	DN3 thymocyte differentiation	Hyper	0.00665202
GO:1905546	0.00534977	Inf	0.00534977	1	1	cellular response to phenylpropanoid	Hyper	0.00665202
GO:0045937	0.00540691	9.06522	0.355328	3	72	positive regulation of phosphate metabolic process	Hyper	0.00667912
GO:0002822	0.00568536	5.97287	0.712747	4	136	regulation of adaptive immune response based on somatic recombination of immune receptors built from immunoglobulin superfamily domains	Hyper	0.00697749
GO:0002768	0.00578979	19.4304	0.114434	2	24	immune response-regulating cell surface receptor signaling pathway	Hyper	0.00705981
GO:0007204	0.00590397	3.92144	1.63168	6	305	positive regulation of cytosolic calcium ion concentration	Hyper	0.00715289
GO:0050714	0.00595682	5.88966	0.722219	4	135	positive regulation of protein secretion	Hyper	0.00717095
GO:0002274	0.00618198	4.57954	1.1609	5	217	myeloid leukocyte activation	Hyper	0.0073949
GO:0031639	0.00665759	18.0783	0.123045	2	23	plasminogen activation	Hyper	0.00788533
GO:0002831	0.00667542	3.81744	1.67448	6	313	regulation of response to biotic stimulus	Hyper	0.00788533
GO:0032418	0.00677078	8.32242	0.385183	3	72	lysosome localization	Hyper	0.0079483
GO:2000316	0.00723769	17.2556	0.128394	2	24	regulation of T-helper 17 type immune response	Hyper	0.00844397
GO:0010827	0.00757839	7.97425	0.401233	3	75	regulation of glucose transmembrane transport	Hyper	0.00866509
GO:0061045	0.00757839	7.97425	0.401233	3	75	negative regulation of wound healing	Hyper	0.00866509
GO:0002313	0.00783984	16.5043	0.133744	2	25	mature B cell differentiation involved in immune response	Hyper	0.00866509
GO:0032647	0.00783984	16.5043	0.133744	2	25	regulation of interferon-alpha production	Hyper	0.00866509
GO:0032682	0.00783984	16.5043	0.133744	2	25	negative regulation of chemokine production	Hyper	0.00866509
GO:0042730	0.00783984	16.5043	0.133744	2	25	fibrinolysis	Hyper	0.00866509
GO:0045954	0.00783984	16.5043	0.133744	2	25	positive regulation of natural killer cell mediated cytotoxicity	Hyper	0.00866509
GO:0048843	0.00783984	16.5043	0.133744	2	25	negative regulation of axon extension involved in axon guidance	Hyper	0.00866509
GO:0090330	0.00783984	16.5043	0.133744	2	25	regulation of platelet aggregation	Hyper	0.00866509
GO:0032502	0.0080163	1.6979	32.318	44	6041	developmental process	Hyper	0.00877296
GO:0042110	0.00803027	7.80309	0.409829	3	84	T cell activation	Hyper	0.00877296
GO:0030335	0.00814043	2.97844	2.87818	8	538	positive regulation of cell migration	Hyper	0.00884219
GO:0001816	0.00824056	2.61196	4.13537	10	773	cytokine production	Hyper	0.0088998
GO:0002407	0.0084638	15.8157	0.139094	2	26	dendritic cell chemotaxis	Hyper	0.00896746
GO:0071624	0.0084638	15.8157	0.139094	2	26	positive regulation of granulocyte chemotaxis	Hyper	0.00896746
GO:2000108	0.0084638	15.8157	0.139094	2	26	positive regulation of leukocyte apoptotic process	Hyper	0.00896746
GO:1903530	0.00849299	2.95541	2.89958	8	542	regulation of secretion by cell	Hyper	0.00896746
GO:0046631	0.00858582	5.27989	0.802466	4	150	alpha-beta T cell activation	Hyper	0.00901511
GO:0032945	0.00904621	7.45425	0.427982	3	80	negative regulation of mononuclear cell proliferation	Hyper	0.0093401
GO:0043367	0.00904621	7.45425	0.427982	3	80	CD4-positive, alpha-beta T cell differentiation	Hyper	0.0093401
GO:0031342	0.00910931	15.1822	0.144444	2	27	negative regulation of cell killing	Hyper	0.0093401
GO:0060969	0.00910931	15.1822	0.144444	2	27	negative regulation of gene silencing	Hyper	0.0093401
GO:0009967	0.00914243	2.14518	7.69832	15	1439	positive regulation of signal transduction	Hyper	0.0093401
GO:0044093	0.00953882	2.13374	7.73577	15	1446	positive regulation of molecular function	Hyper	0.00969268
GO:0050858	0.00977614	14.5974	0.149794	2	28	negative regulation of antigen receptor-mediated signaling pathway	Hyper	0.00977614
GO:0072539	0.00977614	14.5974	0.149794	2	28	T-helper 17 cell differentiation	Hyper	0.00977614
GO:1902042	0.00977614	14.5974	0.149794	2	28	negative regulation of extrinsic apoptotic signaling pathway via death domain receptors	Hyper	0.00977614
GO:0099537	1.21733e-21	5.34635	13.7605	59	696	trans-synaptic signaling	Hypo	4.71105e-19
GO:0022008	2.65908e-21	4.51091	20.1161	71	1084	neurogenesis	Hypo	5.14532e-19
GO:0007275	5.49661e-15	2.625	67.3962	127	3701	multicellular organism development	Hypo	7.09062e-13
GO:0030182	1.05857e-14	3.80972	17.7128	56	983	neuron differentiation	Hypo	1.02416e-12
GO:0034330	1.12796e-12	3.95245	12.9499	44	655	cell junction organization	Hypo	8.73041e-11
GO:0007267	1.48539e-12	4.1715	11.5518	41	653	cell-cell signaling	Hypo	9.58076e-11
GO:0120039	1.66941e-11	3.88024	11.8625	40	600	plasma membrane bounded cell projection morphogenesis	Hypo	8.91053e-10
GO:0007420	1.84197e-11	3.6025	14.0769	44	712	brain development	Hypo	8.91053e-10
GO:0099172	4.70954e-11	18.6519	0.88969	12	45	presynapse organization	Hypo	1.84904e-09
GO:0032990	4.77789e-11	3.73517	12.2777	40	621	cell part morphogenesis	Hypo	1.84904e-09
GO:0000904	3.09901e-10	3.48599	13.0686	40	661	cell morphogenesis involved in differentiation	Hypo	1.00083e-08
GO:0050804	3.10334e-10	7.14582	3.10751	19	165	modulation of chemical synaptic transmission	Hypo	1.00083e-08
GO:0051968	2.06042e-09	24.0964	0.553585	9	28	positive regulation of synaptic transmission, glutamatergic	Hypo	5.69558e-08
GO:1905606	2.06042e-09	24.0964	0.553585	9	28	regulation of presynapse assembly	Hypo	5.69558e-08
GO:0019226	7.93143e-09	10.9763	1.34442	12	68	transmission of nerve impulse	Hypo	2.01305e-07
GO:1901888	8.32268e-09	5.74178	3.77624	19	191	regulation of cell junction assembly	Hypo	2.01305e-07
GO:0050890	1.034e-08	4.6497	5.57539	23	282	cognition	Hypo	2.22544e-07
GO:0002009	1.04101e-08	3.6165	9.60865	31	486	morphogenesis of an epithelium	Hypo	2.22544e-07
GO:0007157	1.0926e-08	14.9938	0.869919	10	44	heterophilic cell-cell adhesion via plasma membrane cell adhesion molecules	Hypo	2.22544e-07
GO:0031344	2.15172e-08	3.21469	12.1789	35	616	regulation of cell projection organization	Hypo	4.16357e-07
GO:0051960	2.53021e-08	3.74015	8.36309	28	423	regulation of nervous system development	Hypo	4.66281e-07
GO:0051965	7.33237e-08	11.8492	1.04786	10	53	positive regulation of synapse assembly	Hypo	1.28983e-06
GO:0150063	8.8457e-08	3.82109	7.27569	25	368	visual system development	Hypo	1.48839e-06
GO:0007156	1.29188e-07	5.69161	3.18311	16	161	homophilic cell adhesion via plasma membrane adhesion molecules	Hypo	2.08316e-06
GO:0048468	1.50354e-07	2.75119	16.3941	40	931	cell development	Hypo	2.32749e-06
GO:0007613	4.03705e-07	6.59545	2.25388	13	114	memory	Hypo	6.009e-06
GO:0009887	7.7596e-07	2.93224	11.6724	31	622	animal organ morphogenesis	Hypo	1.11221e-05
GO:0045665	8.40715e-07	8.77691	1.34442	10	68	negative regulation of neuron differentiation	Hypo	1.15847e-05
GO:0021511	8.68105e-07	25.2171	0.355876	6	18	spinal cord patterning	Hypo	1.15847e-05
GO:0051674	9.05235e-07	2.11845	32.3847	61	1638	localization of cell	Hypo	1.16775e-05
GO:0010975	1.06623e-06	4.28631	4.64543	18	244	regulation of neuron projection development	Hypo	1.33107e-05
GO:0021987	1.82254e-06	6.25647	2.1748	12	110	cerebral cortex development	Hypo	2.20414e-05
GO:0007411	1.8876e-06	4.31786	4.3496	17	220	axon guidance	Hypo	2.21364e-05
GO:0007626	2.12408e-06	4.81644	3.45991	15	175	locomotory behavior	Hypo	2.4177e-05
GO:0060078	3.1316e-06	5.90582	2.28771	12	117	regulation of postsynaptic membrane potential	Hypo	3.46265e-05
GO:0030539	3.26336e-06	18.9083	0.43496	6	22	male genitalia development	Hypo	3.50811e-05
GO:0060284	3.94078e-06	2.97817	9.52957	26	482	regulation of cell development	Hypo	4.12185e-05
GO:0007268	4.31993e-06	4.25787	4.13362	16	233	chemical synaptic transmission	Hypo	4.30858e-05
GO:0099560	4.34198e-06	17.795	0.45473	6	23	synaptic membrane adhesion	Hypo	4.30858e-05
GO:0031175	4.76823e-06	3.0217	9.04829	25	496	neuron projection development	Hypo	4.50775e-05
GO:0009653	4.77565e-06	2.59809	14.1136	33	852	anatomical structure morphogenesis	Hypo	4.50775e-05
GO:0007158	5.07151e-06	27.9403	0.276792	5	14	neuron cell-cell adhesion	Hypo	4.67303e-05
GO:0048639	5.61036e-06	4.71969	3.28197	14	166	positive regulation of developmental growth	Hypo	5.00761e-05
GO:0021846	5.6934e-06	16.8054	0.474501	6	24	cell proliferation in forebrain	Hypo	5.00761e-05
GO:0048167	6.6692e-06	4.34941	3.79601	15	192	regulation of synaptic plasticity	Hypo	5.73552e-05
GO:0021761	6.82785e-06	16.1418	0.487762	6	25	limbic system development	Hypo	5.7443e-05
GO:0030534	7.00495e-06	5.42111	2.47136	12	125	adult behavior	Hypo	5.7679e-05
GO:2000463	7.36726e-06	15.9199	0.494272	6	25	positive regulation of excitatory postsynaptic potential	Hypo	5.93986e-05
GO:0098609	8.73821e-06	2.39326	16.4351	36	843	cell-cell adhesion	Hypo	6.90141e-05
GO:0001655	9.87473e-06	3.33609	6.52439	20	330	urogenital system development	Hypo	7.64304e-05
GO:0065007	1.19214e-05	1.73415	233.949	269	11833	biological regulation	Hypo	9.04623e-05
GO:0010976	1.28582e-05	4.67965	3.06449	13	155	positive regulation of neuron projection development	Hypo	9.45076e-05
GO:0007416	1.29429e-05	6.23712	1.80579	10	94	synapse assembly	Hypo	9.45076e-05
GO:0045666	1.37079e-05	6.19919	1.81892	10	92	positive regulation of neuron differentiation	Hypo	9.81626e-05
GO:0009888	1.41195e-05	2.0122	29.1727	53	1528	tissue development	Hypo	9.81626e-05
GO:2000311	1.43259e-05	21.137	0.333256	5	17	regulation of AMPA receptor activity	Hypo	9.81626e-05
GO:0045165	1.44581e-05	4.6211	3.09663	13	162	cell fate commitment	Hypo	9.81626e-05
GO:0007610	1.58755e-05	3.33935	6.18309	19	331	behavior	Hypo	0.000105928
GO:0040007	1.78533e-05	2.27981	17.6752	37	894	growth	Hypo	0.000117105
GO:0021517	1.9396e-05	9.82207	0.850148	7	43	ventral spinal cord development	Hypo	0.000125104
GO:0048593	2.23101e-05	5.23393	2.33297	11	118	camera-type eye morphogenesis	Hypo	0.000141541
GO:0045944	2.28328e-05	2.1192	22.1632	43	1121	positive regulation of transcription by RNA polymerase II	Hypo	0.000142521
GO:0021537	2.54894e-05	4.36032	3.26632	13	169	telencephalon development	Hypo	0.000156578
GO:0042063	2.74851e-05	3.32158	5.87195	18	297	gliogenesis	Hypo	0.000166199
GO:0007423	2.88036e-05	3.4498	5.34558	17	282	sensory organ development	Hypo	0.000171492
GO:0051240	2.94039e-05	1.98525	27.6199	50	1397	positive regulation of multicellular organismal process	Hypo	0.000172414
GO:0048565	3.29182e-05	4.99878	2.43182	11	123	digestive tract development	Hypo	0.000190139
GO:0021515	4.07191e-05	8.62169	0.949003	7	48	cell differentiation in spinal cord	Hypo	0.000228287
GO:0021872	4.07191e-05	8.62169	0.949003	7	48	forebrain generation of neurons	Hypo	0.000228287
GO:0010646	4.15815e-05	1.95819	28.9313	51	1564	regulation of cell communication	Hypo	0.000228287
GO:0030855	4.18822e-05	2.47434	12.2184	28	618	epithelial cell differentiation	Hypo	0.000228287
GO:0060485	4.28669e-05	3.33367	5.51608	17	279	mesenchyme development	Hypo	0.00023041
GO:0051049	4.36637e-05	1.90606	31.1506	54	1600	regulation of transport	Hypo	0.000231213
GO:0198738	4.42113e-05	2.81034	8.44217	22	427	cell-cell signaling by wnt	Hypo	0.000231213
GO:0097120	4.53578e-05	10.9182	0.665037	6	34	receptor localization to synapse	Hypo	0.000234046
GO:0090596	4.61088e-05	3.46304	5.00204	16	253	sensory organ morphogenesis	Hypo	0.000234791
GO:0046903	5.20895e-05	2.18138	17.8729	36	904	secretion	Hypo	0.0002618
GO:0043113	5.34007e-05	8.21971	0.988545	7	50	receptor clustering	Hypo	0.00026495
GO:0023052	5.48185e-05	10.3609	0.681381	6	44	signaling	Hypo	0.000267077
GO:0099565	5.52097e-05	5.84218	1.72067	9	88	chemical synaptic transmission, postsynaptic	Hypo	0.000267077
GO:0001822	5.83815e-05	3.24555	5.65447	17	286	kidney development	Hypo	0.000276386
GO:0007413	5.85625e-05	14.7849	0.43496	5	22	axonal fasciculation	Hypo	0.000276386
GO:0051093	6.52055e-05	2.15518	18.0706	36	914	negative regulation of developmental process	Hypo	0.000301977
GO:0060134	6.55454e-05	25.0729	0.237251	4	12	prepulse inhibition	Hypo	0.000301977
GO:1905114	6.95019e-05	2.79409	8.09084	21	423	cell surface receptor signaling pathway involved in cell-cell signaling	Hypo	0.000316438
GO:0021953	7.0358e-05	6.51129	1.38413	8	72	central nervous system neuron differentiation	Hypo	0.000316611
GO:0051270	7.30532e-05	2.05731	21.0758	40	1066	regulation of cellular component movement	Hypo	0.000324961
GO:0006928	7.59674e-05	2.14564	18.263	36	982	movement of cell or subcellular component	Hypo	0.000334084
GO:0023061	8.12473e-05	2.68781	8.79805	22	445	signal release	Hypo	0.000353289
GO:0035418	8.55031e-05	7.56155	1.06178	7	54	protein localization to synapse	Hypo	0.000363942
GO:0072028	8.5578e-05	6.32267	1.4235	8	72	nephron morphogenesis	Hypo	0.000363942
GO:0002067	8.84899e-05	7.51837	1.06763	7	54	glandular epithelial cell differentiation	Hypo	0.000372235
GO:0010469	9.31473e-05	4.07488	3.20288	12	162	regulation of signaling receptor activity	Hypo	0.000387613
GO:0050772	9.44805e-05	6.22502	1.44327	8	73	positive regulation of axonogenesis	Hypo	0.000388978
GO:0023051	9.66083e-05	1.89696	29.109	50	1573	regulation of signaling	Hypo	0.000393552
GO:1904064	0.000100839	4.36975	2.74815	11	139	positive regulation of cation transmembrane transport	Hypo	0.000406508
GO:1904861	0.000112533	12.5649	0.494272	5	25	excitatory synapse assembly	Hypo	0.000448712
GO:0001763	0.000113627	3.72517	3.77624	13	191	morphogenesis of a branching structure	Hypo	0.000448712
GO:0099175	0.000118144	8.97594	0.783445	6	40	regulation of postsynapse organization	Hypo	0.000461837
GO:0008306	0.000138122	5.86276	1.52236	8	77	associative learning	Hypo	0.000529238
GO:0097061	0.000138122	5.86276	1.52236	8	77	dendritic spine organization	Hypo	0.000529238
GO:0031644	0.000142283	4.5826	2.38603	10	122	regulation of nervous system process	Hypo	0.00053984
GO:0003008	0.000144412	1.85565	29.5114	50	1594	system process	Hypo	0.000540242
GO:0021707	0.000146577	50.0119	0.118625	3	6	cerebellar granule cell differentiation	Hypo	0.000540242
GO:2000969	0.000146577	50.0119	0.118625	3	6	positive regulation of AMPA receptor activity	Hypo	0.000540242
GO:0007155	0.000151511	2.45808	10.5034	24	574	cell adhesion	Hypo	0.000553158
GO:0098660	0.000167009	2.14146	16.054	32	812	inorganic ion transmembrane transport	Hypo	0.00060404
GO:0007612	0.000171999	6.67453	1.18294	7	61	learning	Hypo	0.000612266
GO:0071625	0.000172447	18.2316	0.296563	4	15	vocalization behavior	Hypo	0.000612266
GO:0007165	0.000191682	1.50771	106.939	138	5492	signal transduction	Hypo	0.000665184
GO:2000027	0.000192198	4.8894	2.02031	9	103	regulation of animal organ morphogenesis	Hypo	0.000665184
GO:0009719	0.000192508	1.81334	30.5658	51	1546	response to endogenous stimulus	Hypo	0.000665184
GO:0032409	0.000244054	2.96672	5.7731	16	292	regulation of transporter activity	Hypo	0.00083583
GO:0021521	0.000252751	37.5067	0.138396	3	7	ventral spinal cord interneuron specification	Hypo	0.000850561
GO:0098943	0.000252751	37.5067	0.138396	3	7	neurotransmitter receptor transport, postsynaptic endosome to lysosome	Hypo	0.000850561
GO:0006811	0.000267742	1.90789	23.2003	41	1198	ion transport	Hypo	0.000893243
GO:0048864	0.000275559	5.25113	1.68053	8	85	stem cell development	Hypo	0.000911465
GO:0007507	0.000288437	2.81313	6.45981	17	334	heart development	Hypo	0.000939614
GO:0071300	0.000288925	6.08849	1.28511	7	65	cellular response to retinoic acid	Hypo	0.000939614
GO:0098962	0.000291415	15.4249	0.336105	4	17	regulation of postsynaptic neurotransmitter receptor activity	Hypo	0.000939814
GO:0021536	0.000299975	9.84815	0.601714	5	31	diencephalon development	Hypo	0.000959425
GO:0046660	0.000334391	4.5109	2.1748	9	110	female sex differentiation	Hypo	0.00106073
GO:0010647	0.000361353	1.75068	32.187	52	1628	positive regulation of cell communication	Hypo	0.00113694
GO:0001736	0.000382505	5.78802	1.34442	7	68	establishment of planar polarity	Hypo	0.00117842
GO:0050769	0.000383522	4.01151	2.69493	10	139	positive regulation of neurogenesis	Hypo	0.00117842
GO:0030334	0.000386919	2.01087	17.573	33	900	regulation of cell migration	Hypo	0.00117842
GO:0030538	0.000389761	Inf	0.0395418	2	2	embryonic genitalia morphogenesis	Hypo	0.00117842
GO:0097402	0.000389761	Inf	0.0395418	2	2	neuroblast migration	Hypo	0.00117842
GO:0023056	0.00039425	1.74335	32.3056	52	1634	positive regulation of signaling	Hypo	0.00118275
GO:0021683	0.000398479	30.0036	0.158167	3	8	cerebellar granular layer morphogenesis	Hypo	0.00118624
GO:0018108	0.000406929	2.63643	7.27569	18	368	peptidyl-tyrosine phosphorylation	Hypo	0.00120215
GO:0051130	0.000413803	1.94167	19.8697	36	1005	positive regulation of cellular component organization	Hypo	0.0012132
GO:0040013	0.000420246	2.62876	7.29546	18	369	negative regulation of locomotion	Hypo	0.00122282
GO:0099504	0.000431987	5.65635	1.37034	7	71	synaptic vesicle cycle	Hypo	0.0012476
GO:0050654	0.00044159	8.97068	0.652439	5	33	chondroitin sulfate proteoglycan metabolic process	Hypo	0.00125658
GO:1903539	0.00044159	8.97068	0.652439	5	33	protein localization to postsynaptic membrane	Hypo	0.00125658
GO:0043410	0.000471709	3.02702	4.93965	14	255	positive regulation of MAPK cascade	Hypo	0.00133249
GO:1901700	0.000481741	1.72648	32.5824	52	1648	response to oxygen-containing compound	Hypo	0.00135097
GO:0060560	0.000493606	3.16673	4.38914	13	222	developmental growth involved in morphogenesis	Hypo	0.00137429
GO:0048754	0.000505851	4.75756	1.83669	8	94	branching morphogenesis of an epithelial tube	Hypo	0.00139832
GO:1903530	0.000514309	2.28402	10.7158	23	542	regulation of secretion by cell	Hypo	0.00141161
GO:0051094	0.000561758	1.89152	20.9792	37	1096	positive regulation of developmental process	Hypo	0.00150051
GO:2001141	0.000562929	1.54259	61.6852	86	3120	regulation of RNA biosynthetic process	Hypo	0.00150051
GO:0043586	0.000566084	12.5305	0.395418	4	20	tongue development	Hypo	0.00150051
GO:0097503	0.000566084	12.5305	0.395418	4	20	sialylation	Hypo	0.00150051
GO:0098698	0.000566084	12.5305	0.395418	4	20	postsynaptic specialization assembly	Hypo	0.00150051
GO:0060004	0.000579604	25.1433	0.176963	3	9	reflex	Hypo	0.00150949
GO:0097119	0.000588974	25.0015	0.177938	3	9	postsynaptic density protein 95 clustering	Hypo	0.00150949
GO:0098953	0.000588974	25.0015	0.177938	3	9	receptor diffusion trapping	Hypo	0.00150949
GO:0098970	0.000588974	25.0015	0.177938	3	9	postsynaptic neurotransmitter receptor diffusion trapping	Hypo	0.00150949
GO:1990504	0.000588974	25.0015	0.177938	3	9	dense core granule exocytosis	Hypo	0.00150949
GO:0001755	0.000663641	6.29079	1.06763	6	54	neural crest cell migration	Hypo	0.00167862
GO:0022029	0.000663641	6.29079	1.06763	6	54	telencephalon cell migration	Hypo	0.00167862
GO:1902284	0.000668245	8.10111	0.711752	5	36	neuron projection extension involved in neuron projection guidance	Hypo	0.00167929
GO:0042330	0.000676701	2.19405	11.6253	24	588	taxis	Hypo	0.00168629
GO:0030001	0.000684326	1.98238	16.6669	31	843	metal ion transport	Hypo	0.00168629
GO:0007350	0.000688458	11.7927	0.415189	4	21	blastoderm segmentation	Hypo	0.00168629
GO:0021544	0.000688458	11.7927	0.415189	4	21	subpallium development	Hypo	0.00168629
GO:0060998	0.000732696	6.16204	1.0874	6	55	regulation of dendritic spine development	Hypo	0.00178111
GO:0048015	0.00073812	3.4032	3.45991	11	175	phosphatidylinositol-mediated signaling	Hypo	0.00178111
GO:0030198	0.000740978	2.76257	5.7731	15	292	extracellular matrix organization	Hypo	0.00178111
GO:0009953	0.000765402	6.10291	1.09593	6	56	dorsal/ventral pattern formation	Hypo	0.00182574
GO:0007218	0.000772325	4.43956	1.95732	8	99	neuropeptide signaling pathway	Hypo	0.00182574
GO:0032502	0.0008012	1.68281	39.9125	59	2649	developmental process	Hypo	0.00182574
GO:0048665	0.000802689	11.2346	0.431297	4	22	neuron fate specification	Hypo	0.00182574
GO:0042733	0.000807176	6.03844	1.10717	6	56	embryonic digit morphogenesis	Hypo	0.00182574
GO:0034764	0.000807981	3.15885	4.05303	12	205	positive regulation of transmembrane transport	Hypo	0.00182574
GO:0033674	0.000809892	2.3484	9.0353	20	457	positive regulation of kinase activity	Hypo	0.00182574
GO:0001759	0.000828434	11.1369	0.43496	4	22	organ induction	Hypo	0.00182574
GO:0021697	0.000828434	11.1369	0.43496	4	22	cerebellar cortex formation	Hypo	0.00182574
GO:0030325	0.000828434	11.1369	0.43496	4	22	adrenal gland development	Hypo	0.00182574
GO:0060563	0.000828434	11.1369	0.43496	4	22	neuroepithelial cell differentiation	Hypo	0.00182574
GO:0099590	0.000828434	11.1369	0.43496	4	22	neurotransmitter receptor internalization	Hypo	0.00182574
GO:0021889	0.000829094	21.4286	0.197709	3	10	olfactory bulb interneuron differentiation	Hypo	0.00182574
GO:0060923	0.000829094	21.4286	0.197709	3	10	cardiac muscle cell fate commitment	Hypo	0.00182574
GO:0030030	0.000830309	2.00885	15.4146	29	838	cell projection organization	Hypo	0.00182574
GO:0007169	0.000933995	2.17851	11.1993	23	572	transmembrane receptor protein tyrosine kinase signaling pathway	Hypo	0.00204213
GO:0001708	0.000966482	5.80924	1.14453	6	59	cell fate specification	Hypo	0.00210128
GO:0032414	0.0010021	4.25162	2.0364	8	103	positive regulation of ion transmembrane transporter activity	Hypo	0.00216656
GO:0001508	0.00106478	3.79237	2.55044	9	129	action potential	Hypo	0.00228927
GO:0140352	0.00107473	1.94493	16.3901	30	829	export from cell	Hypo	0.00229791
GO:2001222	0.00109349	7.17356	0.790836	5	40	regulation of neuron migration	Hypo	0.0023139
GO:0002088	0.00110276	4.76751	1.60144	7	81	lens development in camera-type eye	Hypo	0.0023139
GO:0072009	0.0011359	4.16346	2.07594	8	105	nephron epithelium development	Hypo	0.0023139
GO:0003167	0.00115396	99.7396	0.0593127	2	3	atrioventricular bundle cell differentiation	Hypo	0.0023139
GO:0009946	0.00115396	99.7396	0.0593127	2	3	proximal/distal axis specification	Hypo	0.0023139
GO:0021530	0.00115396	99.7396	0.0593127	2	3	spinal cord oligodendrocyte cell fate specification	Hypo	0.0023139
GO:0060594	0.00115396	99.7396	0.0593127	2	3	mammary gland specification	Hypo	0.0023139
GO:0060596	0.00115396	99.7396	0.0593127	2	3	mammary placode formation	Hypo	0.0023139
GO:0061074	0.00115396	99.7396	0.0593127	2	3	regulation of neural retina development	Hypo	0.0023139
GO:0097114	0.00115396	99.7396	0.0593127	2	3	NMDA glutamate receptor clustering	Hypo	0.0023139
GO:1905072	0.00115396	99.7396	0.0593127	2	3	cardiac jelly development	Hypo	0.0023139
GO:2000809	0.00115396	99.7396	0.0593127	2	3	positive regulation of synaptic vesicle clustering	Hypo	0.0023139
GO:0002092	0.00116651	10.022	0.474501	4	24	positive regulation of receptor internalization	Hypo	0.00232701
GO:0001505	0.00123772	3.40879	3.13378	10	160	regulation of neurotransmitter levels	Hypo	0.00244531
GO:0006351	0.00123845	1.49226	64.1368	87	3244	transcription, DNA-templated	Hypo	0.00244531
GO:1903508	0.00127809	1.68408	29.9134	47	1513	positive regulation of nucleic acid-templated transcription	Hypo	0.00251077
GO:0009880	0.00130602	6.86005	0.821612	5	42	embryonic pattern specification	Hypo	0.00255268
GO:0044057	0.00132853	2.36196	8.06495	18	422	regulation of system process	Hypo	0.00258362
GO:0060021	0.00136598	4.58094	1.66075	7	84	roof of mouth development	Hypo	0.00262248
GO:0048843	0.00136727	9.54422	0.494272	4	25	negative regulation of axon extension involved in axon guidance	Hypo	0.00262248
GO:0060443	0.00136884	6.78499	0.830377	5	42	mammary gland morphogenesis	Hypo	0.00262248
GO:0001964	0.00142944	16.8569	0.234623	3	12	startle response	Hypo	0.00271999
GO:0014031	0.00146384	4.52195	1.68053	7	85	mesenchymal cell development	Hypo	0.00271999
GO:0048813	0.00146532	3.61049	2.66907	9	135	dendrite morphogenesis	Hypo	0.00271999
GO:0001568	0.00147431	1.9734	14.4921	27	733	blood vessel development	Hypo	0.00271999
GO:0048935	0.00147596	16.6647	0.237251	3	12	peripheral nervous system neuron development	Hypo	0.00271999
GO:0060019	0.00147596	16.6647	0.237251	3	12	radial glial cell differentiation	Hypo	0.00271999
GO:0071696	0.00147596	16.6647	0.237251	3	12	ectodermal placode development	Hypo	0.00271999
GO:0099151	0.00147596	16.6647	0.237251	3	12	regulation of postsynaptic density assembly	Hypo	0.00271999
GO:0007187	0.00150497	5.29467	1.24557	6	63	G protein-coupled receptor signaling pathway, coupled to cyclic nucleotide second messenger	Hypo	0.0027603
GO:0040011	0.00151683	2.27784	8.84926	19	488	locomotion	Hypo	0.00276893
GO:0035108	0.00154252	3.58184	2.68884	9	136	limb morphogenesis	Hypo	0.00280261
GO:0050807	0.0015549	3.94676	2.17879	8	113	regulation of synapse organization	Hypo	0.0028119
GO:0007263	0.00159094	9.10985	0.514043	4	26	nitric oxide mediated signal transduction	Hypo	0.00286369
GO:0006940	0.00163353	5.20308	1.26534	6	64	regulation of smooth muscle contraction	Hypo	0.00291326
GO:0048645	0.00163353	5.20308	1.26534	6	64	animal organ formation	Hypo	0.00291326
GO:0007399	0.00169316	2.21117	9.64893	20	643	nervous system development	Hypo	0.00300575
GO:0050805	0.00177027	5.11458	1.28511	6	65	negative regulation of synaptic transmission	Hypo	0.00312829
GO:0042475	0.00179052	4.35369	1.73984	7	88	odontogenesis of dentin-containing tooth	Hypo	0.00314969
GO:0050919	0.00187335	6.275	0.88969	5	45	negative chemotaxis	Hypo	0.00327979
GO:0021984	0.00189079	14.9973	0.257022	3	13	adenohypophysis development	Hypo	0.00327979
GO:1905208	0.00189079	14.9973	0.257022	3	13	negative regulation of cardiocyte differentiation	Hypo	0.00327979
GO:1901698	0.00189838	1.76659	21.6491	36	1095	response to nitrogen compound	Hypo	0.00327979
GO:0008015	0.00200379	2.1649	9.74705	20	493	blood circulation	Hypo	0.00344652
GO:0014033	0.00203793	4.24827	1.77938	7	90	neural crest cell differentiation	Hypo	0.00348973
GO:0021983	0.00205083	8.41992	0.549115	4	28	pituitary gland development	Hypo	0.00349635
GO:0048738	0.00215415	2.7924	4.5473	12	230	cardiac muscle tissue development	Hypo	0.00361262
GO:0061333	0.00220288	50.7402	0.0777583	2	4	renal tubule morphogenesis	Hypo	0.00361262
GO:0060579	0.00223997	50.3015	0.0784177	2	4	ventral spinal cord interneuron fate commitment	Hypo	0.00361262
GO:0050679	0.00224933	2.93292	3.97395	11	201	positive regulation of epithelial cell proliferation	Hypo	0.00361262
GO:0060070	0.00227568	5.97055	0.928521	5	48	canonical Wnt signaling pathway	Hypo	0.00361262
GO:0021779	0.00227773	49.8669	0.0790836	2	4	oligodendrocyte cell fate commitment	Hypo	0.00361262
GO:0021780	0.00227773	49.8669	0.0790836	2	4	glial cell fate specification	Hypo	0.00361262
GO:0021828	0.00227773	49.8669	0.0790836	2	4	gonadotrophin-releasing hormone neuronal migration to the hypothalamus	Hypo	0.00361262
GO:0031133	0.00227773	49.8669	0.0790836	2	4	regulation of axon diameter	Hypo	0.00361262
GO:0032100	0.00227773	49.8669	0.0790836	2	4	positive regulation of appetite	Hypo	0.00361262
GO:0032109	0.00227773	49.8669	0.0790836	2	4	positive regulation of response to nutrient levels	Hypo	0.00361262
GO:0034287	0.00227773	49.8669	0.0790836	2	4	detection of monosaccharide stimulus	Hypo	0.00361262
GO:0051594	0.00227773	49.8669	0.0790836	2	4	detection of glucose	Hypo	0.00361262
GO:0072086	0.00227773	49.8669	0.0790836	2	4	specification of loop of Henle identity	Hypo	0.00361262
GO:0097112	0.00227773	49.8669	0.0790836	2	4	gamma-aminobutyric acid receptor clustering	Hypo	0.00361262
GO:1904071	0.00227773	49.8669	0.0790836	2	4	presynaptic active zone assembly	Hypo	0.00361262
GO:1905222	0.00227773	49.8669	0.0790836	2	4	atrioventricular canal morphogenesis	Hypo	0.00361262
GO:0099645	0.00237143	13.6331	0.276792	3	14	neurotransmitter receptor localization to postsynaptic specialization membrane	Hypo	0.00374589
GO:0003309	0.0024125	8.01524	0.573356	4	29	type B pancreatic cell differentiation	Hypo	0.00379528
GO:0051588	0.00245768	4.09934	1.83869	7	93	regulation of neurotransmitter transport	Hypo	0.00383568
GO:0071805	0.002458	3.65031	2.34304	8	120	potassium ion transmembrane transport	Hypo	0.00383568
GO:0014070	0.002491	1.81275	18.0904	31	915	response to organic cyclic compound	Hypo	0.00387156
GO:2000300	0.00250199	5.83617	0.949003	5	48	regulation of synaptic vesicle exocytosis	Hypo	0.00387308
GO:0001558	0.00252218	2.276	7.86881	17	398	regulation of cell growth	Hypo	0.00388879
GO:0070588	0.00261261	2.49713	5.9115	14	299	calcium ion transmembrane transport	Hypo	0.00401222
GO:0030323	0.00268422	3.04691	3.47968	10	176	respiratory tube development	Hypo	0.0041059
GO:0060071	0.00274196	5.70319	0.968774	5	49	Wnt signaling pathway, planar cell polarity pathway	Hypo	0.00417771
GO:0003206	0.00279513	3.57053	2.39228	8	121	cardiac chamber morphogenesis	Hypo	0.00424202
GO:0034765	0.0028231	2.84214	4.09207	11	214	regulation of ion transmembrane transport	Hypo	0.00426774
GO:0050794	0.00287425	1.53993	68.5582	87	4306	regulation of cellular process	Hypo	0.00432816
GO:0002070	0.00292117	12.4963	0.296563	3	15	epithelial cell maturation	Hypo	0.00438176
GO:0048585	0.00299682	1.60462	31.2182	47	1579	negative regulation of response to stimulus	Hypo	0.00446263
GO:0007215	0.00299815	5.57612	0.988545	5	50	glutamate receptor signaling pathway	Hypo	0.00446263
GO:0098655	0.00306581	1.91448	13.771	25	714	cation transmembrane transport	Hypo	0.00454585
GO:0016079	0.00310694	5.52306	0.996268	5	51	synaptic vesicle exocytosis	Hypo	0.00458927
GO:0060828	0.00315804	2.65651	4.76478	12	241	regulation of canonical Wnt signaling pathway	Hypo	0.004647
GO:0022603	0.00319136	1.88327	14.5674	26	766	regulation of anatomical structure morphogenesis	Hypo	0.00467824
GO:0035295	0.00322951	1.85837	15.3392	27	804	tube development	Hypo	0.0047163
GO:0021545	0.00327117	5.45457	1.00832	5	51	cranial nerve development	Hypo	0.00475919
GO:0070374	0.00351347	2.7567	4.2112	11	213	positive regulation of ERK1 and ERK2 cascade	Hypo	0.00506749
GO:0001574	0.00354305	11.5344	0.316334	3	16	ganglioside biosynthetic process	Hypo	0.00506749
GO:0042481	0.00354305	11.5344	0.316334	3	16	regulation of odontogenesis	Hypo	0.00506749
GO:0048557	0.00354305	11.5344	0.316334	3	16	embryonic digestive tract morphogenesis	Hypo	0.00506749
GO:0007409	0.00355898	3.42039	2.48704	8	132	axonogenesis	Hypo	0.00506749
GO:0001658	0.00356165	5.3382	1.02809	5	52	branching involved in ureteric bud morphogenesis	Hypo	0.00506749
GO:0014016	0.00374662	33.2426	0.0988545	2	5	neuroblast differentiation	Hypo	0.00517433
GO:0019800	0.00374662	33.2426	0.0988545	2	5	peptide cross-linking via chondroitin 4-sulfate glycosaminoglycan	Hypo	0.00517433
GO:0021800	0.00374662	33.2426	0.0988545	2	5	cerebral cortex tangential migration	Hypo	0.00517433
GO:0021855	0.00374662	33.2426	0.0988545	2	5	hypothalamus cell migration	Hypo	0.00517433
GO:0060066	0.00374662	33.2426	0.0988545	2	5	oviduct development	Hypo	0.00517433
GO:0072047	0.00374662	33.2426	0.0988545	2	5	proximal/distal pattern formation involved in nephron development	Hypo	0.00517433
GO:0090259	0.00374662	33.2426	0.0988545	2	5	regulation of retinal ganglion cell axon guidance	Hypo	0.00517433
GO:1903598	0.00374662	33.2426	0.0988545	2	5	positive regulation of gap junction assembly	Hypo	0.00517433
GO:0016477	0.00375707	2.08556	9.59764	19	520	cell migration	Hypo	0.00517433
GO:0051254	0.00379697	1.57511	32.444	48	1641	positive regulation of RNA metabolic process	Hypo	0.00521073
GO:0032228	0.00390678	6.90805	0.652439	4	33	regulation of synaptic transmission, GABAergic	Hypo	0.00534249
GO:0010557	0.00410715	1.55449	34.263	50	1733	positive regulation of macromolecule biosynthetic process	Hypo	0.00559672
GO:0008595	0.00423983	10.7098	0.336105	3	17	anterior/posterior axis specification, embryo	Hypo	0.00572122
GO:0061298	0.00423983	10.7098	0.336105	3	17	retina vasculature development in camera-type eye	Hypo	0.00572122
GO:0048568	0.00424287	2.15436	8.284	17	419	embryonic organ development	Hypo	0.00572122
GO:0021766	0.004447	4.18787	1.54213	6	78	hippocampus development	Hypo	0.00597566
GO:0048588	0.00463438	2.65041	4.36937	11	221	developmental cell growth	Hypo	0.0062059
GO:0007422	0.00473437	4.13026	1.5619	6	79	peripheral nervous system development	Hypo	0.00629623
GO:0014068	0.00473437	4.13026	1.5619	6	79	positive regulation of phosphatidylinositol 3-kinase signaling	Hypo	0.00629623
GO:0021954	0.00475502	4.95748	1.09874	5	56	central nervous system neuron development	Hypo	0.00630203
GO:0031099	0.0047982	2.7919	3.77624	10	191	regeneration	Hypo	0.00633756
GO:0038179	0.00484685	6.4616	0.691981	4	35	neurotrophin signaling pathway	Hypo	0.00638004
GO:1903507	0.0049285	1.656	22.954	36	1161	negative regulation of nucleic acid-templated transcription	Hypo	0.00646552
GO:0030177	0.00497041	3.22545	2.62953	8	133	positive regulation of Wnt signaling pathway	Hypo	0.00649848
GO:0043116	0.00501403	9.99525	0.355876	3	18	negative regulation of vascular permeability	Hypo	0.00653343
GO:0000122	0.00504776	1.77103	16.6273	28	841	negative regulation of transcription by RNA polymerase II	Hypo	0.00655531
GO:0048863	0.00510756	3.5547	2.0966	7	108	stem cell differentiation	Hypo	0.00661079
GO:0007224	0.00519766	3.19966	2.6493	8	134	smoothened signaling pathway	Hypo	0.0066827
GO:0050768	0.00519766	3.19966	2.6493	8	134	negative regulation of neurogenesis	Hypo	0.0066827
GO:0007405	0.005297	4.82348	1.12694	5	57	neuroblast proliferation	Hypo	0.00678787
GO:0071417	0.00536175	1.9041	12.1196	22	613	cellular response to organonitrogen compound	Hypo	0.00683511
GO:0048009	0.00536918	6.2593	0.711752	4	36	insulin-like growth factor receptor signaling pathway	Hypo	0.00683511
GO:0099068	0.0054324	25.2051	0.117366	2	6	postsynapse assembly	Hypo	0.00685799
GO:0021886	0.00554664	24.9305	0.118625	2	6	hypothalamus gonadotrophin-releasing hormone neuron differentiation	Hypo	0.00685799
GO:0031017	0.00554664	24.9305	0.118625	2	6	exocrine pancreas development	Hypo	0.00685799
GO:0090238	0.00554664	24.9305	0.118625	2	6	positive regulation of arachidonic acid secretion	Hypo	0.00685799
GO:0097105	0.00554664	24.9305	0.118625	2	6	presynaptic membrane assembly	Hypo	0.00685799
GO:0097151	0.00554664	24.9305	0.118625	2	6	positive regulation of inhibitory postsynaptic potential	Hypo	0.00685799
GO:0097475	0.00554664	24.9305	0.118625	2	6	motor neuron migration	Hypo	0.00685799
GO:1900020	0.00554664	24.9305	0.118625	2	6	positive regulation of protein kinase C activity	Hypo	0.00685799
GO:1900454	0.00554664	24.9305	0.118625	2	6	positive regulation of long-term synaptic depression	Hypo	0.00685799
GO:0097106	0.00573376	9.45079	0.372527	3	19	postsynaptic density organization	Hypo	0.00706677
GO:0043270	0.00576027	2.45019	5.14043	12	260	positive regulation of ion transport	Hypo	0.0070769
GO:0007213	0.00586791	9.36999	0.375647	3	19	G protein-coupled acetylcholine receptor signaling pathway	Hypo	0.00711931
GO:0043576	0.00586791	9.36999	0.375647	3	19	regulation of respiratory gaseous exchange	Hypo	0.00711931
GO:0060039	0.00586791	9.36999	0.375647	3	19	pericardium development	Hypo	0.00711931
GO:0007340	0.00592783	6.06926	0.731523	4	37	acrosome reaction	Hypo	0.00711931
GO:0021587	0.00592783	6.06926	0.731523	4	37	cerebellum morphogenesis	Hypo	0.00711931
GO:0060428	0.00592783	6.06926	0.731523	4	37	lung epithelium development	Hypo	0.00711931
GO:0098926	0.00592783	6.06926	0.731523	4	37	postsynaptic signal transduction	Hypo	0.00711931
GO:0060541	0.00594195	2.70135	3.89487	10	197	respiratory system development	Hypo	0.00711931
GO:0072171	0.00613439	4.64428	1.16648	5	59	mesonephric tubule morphogenesis	Hypo	0.00732719
GO:0006357	0.00629908	1.85291	13.0748	23	709	regulation of transcription by RNA polymerase II	Hypo	0.00750075
GO:0008285	0.00648987	1.79438	14.6107	25	739	negative regulation of cell population proliferation	Hypo	0.00769616
GO:0019219	0.00650296	1.38024	71.5706	91	3620	regulation of nucleobase-containing compound metabolic process	Hypo	0.00769616
GO:0071363	0.00665682	1.86572	12.3538	22	631	cellular response to growth factor stimulus	Hypo	0.00784367
GO:0060322	0.00666813	5.82228	0.75414	4	42	head development	Hypo	0.00784367
GO:0003002	0.00670938	2.51165	4.59508	11	239	regionalization	Hypo	0.00784842
GO:0043524	0.00673226	3.05312	2.76792	8	140	negative regulation of neuron apoptotic process	Hypo	0.00784842
GO:0043010	0.00674293	3.05105	2.76799	8	145	camera-type eye development	Hypo	0.00784842
GO:2000177	0.00675329	3.81521	1.68053	6	85	regulation of neural precursor cell proliferation	Hypo	0.00784842
GO:0048736	0.00679884	2.81969	3.36105	9	170	appendage development	Hypo	0.00785959
GO:0014047	0.00680352	8.81829	0.395418	3	20	glutamate secretion	Hypo	0.00785959
GO:0071840	0.00683241	1.32872	114.968	137	5815	cellular component organization or biogenesis	Hypo	0.00786947
GO:0099173	0.00700069	5.75198	0.765629	4	40	postsynapse organization	Hypo	0.00803937
GO:0009311	0.00706071	4.47788	1.20602	5	61	oligosaccharide metabolic process	Hypo	0.0080843
GO:0010863	0.00715833	5.72177	0.771065	4	39	positive regulation of phospholipase C activity	Hypo	0.00814787
GO:0072210	0.00715833	5.72177	0.771065	4	39	metanephric nephron development	Hypo	0.00814787
GO:0007623	0.00728803	2.61642	4.01349	10	203	circadian rhythm	Hypo	0.00823902
GO:0031328	0.00749272	1.49381	36.2203	51	1832	positive regulation of cellular biosynthetic process	Hypo	0.00823902
GO:0021782	0.00752464	3.29067	2.25388	7	114	glial cell development	Hypo	0.00823902
GO:0001657	0.00754717	3.72056	1.72007	6	87	ureteric bud development	Hypo	0.00823902
GO:0060080	0.00758224	20.0571	0.13763	2	7	inhibitory postsynaptic potential	Hypo	0.00823902
GO:0043069	0.0076467	1.71122	17.1611	28	868	negative regulation of programmed cell death	Hypo	0.00823902
GO:0003164	0.0076642	19.9432	0.138396	2	7	His-Purkinje system development	Hypo	0.00823902
GO:0014012	0.0076642	19.9432	0.138396	2	7	peripheral nervous system axon regeneration	Hypo	0.00823902
GO:0021798	0.0076642	19.9432	0.138396	2	7	forebrain dorsal/ventral pattern formation	Hypo	0.00823902
GO:0021902	0.0076642	19.9432	0.138396	2	7	commitment of neuronal cell to specific neuron type in forebrain	Hypo	0.00823902
GO:0023041	0.0076642	19.9432	0.138396	2	7	neuronal signal transduction	Hypo	0.00823902
GO:0031077	0.0076642	19.9432	0.138396	2	7	post-embryonic camera-type eye development	Hypo	0.00823902
GO:0042940	0.0076642	19.9432	0.138396	2	7	D-amino acid transport	Hypo	0.00823902
GO:0048842	0.0076642	19.9432	0.138396	2	7	positive regulation of axon extension involved in axon guidance	Hypo	0.00823902
GO:0060013	0.0076642	19.9432	0.138396	2	7	righting reflex	Hypo	0.00823902
GO:0060872	0.0076642	19.9432	0.138396	2	7	semicircular canal development	Hypo	0.00823902
GO:0061439	0.0076642	19.9432	0.138396	2	7	kidney vasculature morphogenesis	Hypo	0.00823902
GO:0071286	0.0076642	19.9432	0.138396	2	7	cellular response to magnesium ion	Hypo	0.00823902
GO:1902474	0.0076642	19.9432	0.138396	2	7	positive regulation of protein localization to synapse	Hypo	0.00823902
GO:1904936	0.0076642	19.9432	0.138396	2	7	interneuron migration	Hypo	0.00823902
GO:0035270	0.00774806	4.36688	1.23249	5	64	endocrine system development	Hypo	0.0083061
GO:0021884	0.0078227	8.32789	0.415189	3	21	forebrain neuron development	Hypo	0.00836294
GO:0035113	0.00788053	3.26001	2.27365	7	115	embryonic appendage morphogenesis	Hypo	0.00840155
GO:0021700	0.00790968	2.34457	5.35791	12	271	developmental maturation	Hypo	0.00840947
GO:0072163	0.00796839	3.67497	1.73984	6	88	mesonephric epithelium development	Hypo	0.00844867
GO:0019229	0.00808051	4.32295	1.24557	5	63	regulation of vasoconstriction	Hypo	0.00854414
GO:0048709	0.00818699	3.65191	1.74967	6	89	oligodendrocyte differentiation	Hypo	0.00863315
GO:0061351	0.00838519	8.07774	0.425108	3	22	neural precursor cell proliferation	Hypo	0.00881632
GO:0030516	0.00840626	3.63047	1.75961	6	89	regulation of axon extension	Hypo	0.00881632
GO:1902531	0.00872607	1.50862	32.2266	46	1630	regulation of intracellular signal transduction	Hypo	0.00912699
GO:0021904	0.00892706	7.88911	0.43496	3	22	dorsal/ventral neural tube patterning	Hypo	0.00931205
GO:0032412	0.00905954	2.88993	2.9133	8	150	regulation of ion transmembrane transporter activity	Hypo	0.00942484
GO:0040012	0.00919687	1.80916	12.7246	22	665	regulation of locomotion	Hypo	0.00954206
GO:0001525	0.0092808	1.86357	11.2101	20	567	angiogenesis	Hypo	0.00954873
GO:0001504	0.00930199	5.26911	0.830377	4	42	neurotransmitter uptake	Hypo	0.00954873
GO:0045687	0.00930199	5.26911	0.830377	4	42	positive regulation of glial cell differentiation	Hypo	0.00954873
GO:0061001	0.00930199	5.26911	0.830377	4	42	regulation of dendritic spine morphogenesis	Hypo	0.00954873
GO:1901379	0.00933338	3.54463	1.79915	6	91	regulation of potassium ion transmembrane transport	Hypo	0.0095556
GO:0055085	0.00936393	1.58166	23.9553	36	1241	transmembrane transport	Hypo	0.00956158
GO:0048839	0.00939301	2.66853	3.53927	9	180	inner ear development	Hypo	0.00956604
GO:0045664	0.00946043	5.23072	0.833597	4	44	regulation of neuron differentiation	Hypo	0.00960941
GO:0010517	0.00979519	4.10962	1.30488	5	66	regulation of phospholipase activity	Hypo	0.00986763
GO:0061180	0.00979519	4.10962	1.30488	5	66	mammary gland epithelium development	Hypo	0.00986763
GO:0008585	0.00982331	3.5032	1.81892	6	92	female gonad development	Hypo	0.00986763
GO:0048706	0.00984883	3.11483	2.37251	7	120	embryonic skeletal system development	Hypo	0.00986763
GO:0072359	0.00985614	1.88627	10.5319	19	563	circulatory system development	Hypo	0.00986763
GO:0072078	0.00986763	16.8138	0.156378	2	8	nephron tubule morphogenesis	Hypo	0.00986763

## Sheet: CS3.promotersMethylation.GOenrichment
GOBPID	Pvalue	OddsRatio	ExpCount	Count	Size	Term	Meth_direction	p.adjusted
GO:0006607	9.6797e-05	40.24	0.0907135	3	20	NLS-bearing protein import into nucleus	Hyper	0.00271032
GO:0007155	0.000592814	2.86406	6.49055	16	1431	cell adhesion	Hyper	0.0082994
GO:0014812	0.00114596	9.48565	0.458103	4	101	muscle cell migration	Hyper	0.00905104
GO:0030949	0.00233874	32.1523	0.0725708	2	16	positive regulation of vascular endothelial growth factor receptor signaling pathway	Hyper	0.00905104
GO:0035729	0.0026428	30.007	0.0771065	2	17	cellular response to hepatocyte growth factor stimulus	Hyper	0.00905104
GO:0061298	0.0026428	30.007	0.0771065	2	17	retina vasculature development in camera-type eye	Hyper	0.00905104
GO:0021884	0.00403317	23.6842	0.0952492	2	21	forebrain neuron development	Hyper	0.00905104
GO:0050687	0.00442349	22.4987	0.0997848	2	22	negative regulation of defense response to virus	Hyper	0.00905104
GO:0051758	0.00453567	Inf	0.00453567	1	1	homologous chromosome movement towards spindle pole in meiosis I anaphase	Hyper	0.00905104
GO:0060301	0.00453567	Inf	0.00453567	1	1	positive regulation of cytokine activity	Hyper	0.00905104
GO:1902378	0.00453567	Inf	0.00453567	1	1	VEGF-activated neuropilin signaling pathway involved in axon guidance	Hyper	0.00905104
GO:1904691	0.00453567	Inf	0.00453567	1	1	negative regulation of type B pancreatic cell proliferation	Hyper	0.00905104
GO:1905040	0.00453567	Inf	0.00453567	1	1	otic placode development	Hyper	0.00905104
GO:0014910	0.00574034	8.85299	0.362854	3	80	regulation of smooth muscle cell migration	Hyper	0.00905104
GO:0098739	0.00686371	5.65799	0.752922	4	166	import across plasma membrane	Hyper	0.00905104
GO:0048240	0.00711235	17.3006	0.126999	2	28	sperm capacitation	Hyper	0.00905104
GO:0001659	0.00760709	5.48697	0.7756	4	171	temperature homeostasis	Hyper	0.00905104
GO:0035767	0.00761687	16.6589	0.131535	2	29	endothelial cell chemotaxis	Hyper	0.00905104
GO:0005986	0.00905104	222.312	0.00907135	1	2	sucrose biosynthetic process	Hyper	0.00905104
GO:0006624	0.00905104	222.312	0.00907135	1	2	vacuolar protein processing	Hyper	0.00905104
GO:0021649	0.00905104	222.312	0.00907135	1	2	vestibulocochlear nerve structural organization	Hyper	0.00905104
GO:0043006	0.00905104	222.312	0.00907135	1	2	activation of phospholipase A2 activity by calcium-mediated signaling	Hyper	0.00905104
GO:0061441	0.00905104	222.312	0.00907135	1	2	renal artery morphogenesis	Hyper	0.00905104
GO:0062177	0.00905104	222.312	0.00907135	1	2	radial spoke assembly	Hyper	0.00905104
GO:0097102	0.00905104	222.312	0.00907135	1	2	endothelial tip cell fate specification	Hyper	0.00905104
GO:0097323	0.00905104	222.312	0.00907135	1	2	B cell adhesion	Hyper	0.00905104
GO:1902336	0.00905104	222.312	0.00907135	1	2	positive regulation of retinal ganglion cell axon guidance	Hyper	0.00905104
GO:1904835	0.00905104	222.312	0.00907135	1	2	dorsal root ganglion morphogenesis	Hyper	0.00905104
GO:1903945	9.1979e-07	Inf	0.00197709	2	2	positive regulation of hepatocyte apoptotic process	Hypo	4.69093e-05
GO:1901670	2.75777e-06	2290.53	0.00296563	2	3	negative regulation of superoxide dismutase activity	Hypo	7.0323e-05
GO:2001170	9.18186e-06	763.422	0.00494272	2	5	negative regulation of ATP biosynthetic process	Hypo	0.000140401
GO:0044571	1.37648e-05	572.533	0.00593127	2	6	[2Fe-2S] cluster assembly	Hypo	0.000140401
GO:1900408	1.37648e-05	572.533	0.00593127	2	6	negative regulation of cellular response to oxidative stress	Hypo	0.000140401
GO:0030809	2.56644e-05	381.644	0.00790836	2	8	negative regulation of nucleotide biosynthetic process	Hypo	0.000218147
GO:2000121	3.29779e-05	327.105	0.0088969	2	9	regulation of removal of superoxide radicals	Hypo	0.000240268
GO:0097428	0.00010948	163.486	0.0158167	2	16	protein maturation by iron-sulfur cluster transfer	Hypo	0.000697933
GO:1900543	0.000210015	114.4	0.021748	2	22	negative regulation of purine nucleotide metabolic process	Hypo	0.000973704
GO:1901032	0.000210015	114.4	0.021748	2	22	negative regulation of response to reactive oxygen species	Hypo	0.000973704
GO:1903428	0.000210015	114.4	0.021748	2	22	positive regulation of reactive oxygen species biosynthetic process	Hypo	0.000973704
GO:0071451	0.000229882	108.946	0.0227365	2	23	cellular response to superoxide	Hypo	0.000976999
GO:0031163	0.000272271	99.4609	0.0247136	2	25	metallo-sulfur cluster assembly	Hypo	0.00106814
GO:1900017	0.000294789	95.3111	0.0257022	2	26	positive regulation of cytokine production involved in inflammatory response	Hypo	0.00107387
GO:0000305	0.000318187	91.4933	0.0266907	2	27	response to oxygen radical	Hypo	0.00108183
GO:1900371	0.000536874	69.2808	0.0345991	2	35	regulation of purine nucleotide biosynthetic process	Hypo	0.00171129
GO:2000378	0.000968619	50.7704	0.0464616	2	47	negative regulation of reactive oxygen species metabolic process	Hypo	0.00280088
GO:0018191	0.000988545	Inf	0.000988545	1	1	peptidyl-serine octanoylation	Hypo	0.00280088
GO:0009206	0.00157406	39.3609	0.0593127	2	60	purine ribonucleoside triphosphate biosynthetic process	Hypo	0.0041475
GO:0006879	0.00162647	38.6915	0.0603012	2	61	cellular iron ion homeostasis	Hypo	0.0041475
GO:0018872	0.00197617	1073.69	0.00197709	1	2	arsonoacetate metabolic process	Hypo	0.00438194
GO:0032775	0.00197617	1073.69	0.00197709	1	2	DNA methylation on adenine	Hypo	0.00438194
GO:1901255	0.00197617	1073.69	0.00197709	1	2	nucleotide-excision repair involved in interstrand cross-link repair	Hypo	0.00438194
GO:0006801	0.00213522	33.5529	0.0691981	2	70	superoxide metabolic process	Hypo	0.00453735
GO:0009142	0.00251107	30.8216	0.0751294	2	76	nucleoside triphosphate biosynthetic process	Hypo	0.00472216
GO:0006140	0.00270987	29.6156	0.078095	2	79	regulation of nucleotide metabolic process	Hypo	0.00472216
GO:0098586	0.00270987	29.6156	0.078095	2	79	cellular response to virus	Hypo	0.00472216
GO:1903578	0.00270987	29.6156	0.078095	2	79	regulation of ATP metabolic process	Hypo	0.00472216
GO:0009144	0.00277774	29.2342	0.0790836	2	80	purine nucleoside triphosphate metabolic process	Hypo	0.00472216
GO:0009199	0.00277774	29.2342	0.0790836	2	80	ribonucleoside triphosphate metabolic process	Hypo	0.00472216
GO:0000715	0.00296287	536.812	0.00296563	1	3	nucleotide-excision repair, DNA damage recognition	Hypo	0.00487441
GO:0002532	0.00342436	26.1962	0.0879805	2	89	production of molecular mediator involved in inflammatory response	Hypo	0.00545758
GO:1902882	0.00357674	25.6045	0.0899576	2	91	regulation of response to oxidative stress	Hypo	0.00552768
GO:0006790	0.00370346	11.2543	0.320288	3	324	sulfur compound metabolic process	Hypo	0.00555518
GO:1904035	0.00389087	24.4975	0.0939117	2	95	regulation of epithelial cell apoptotic process	Hypo	0.00562608
GO:0098869	0.00397135	24.2355	0.0949003	2	96	cellular oxidant detoxification	Hypo	0.00562608
GO:0062014	0.00430101	23.2408	0.0988545	2	100	negative regulation of small molecule metabolic process	Hypo	0.0057347
GO:0009150	0.00438096	10.5817	0.340059	3	344	purine ribonucleotide metabolic process	Hypo	0.0057347
GO:0051341	0.00438536	23.0047	0.099843	2	101	regulation of oxidoreductase activity	Hypo	0.0057347
GO:0006771	0.00493353	268.375	0.00494272	1	5	riboflavin metabolic process	Hypo	0.0058514
GO:0010572	0.00493353	268.375	0.00494272	1	5	positive regulation of platelet activation	Hypo	0.0058514
GO:0018364	0.00493353	268.375	0.00494272	1	5	peptidyl-glutamine methylation	Hypo	0.0058514
GO:0032218	0.00493353	268.375	0.00494272	1	5	riboflavin transport	Hypo	0.0058514
GO:0019693	0.00524832	9.89953	0.362796	3	367	ribose phosphate metabolic process	Hypo	0.00608329
GO:0051897	0.00593568	19.6138	0.116648	2	118	positive regulation of protein kinase B signaling	Hypo	0.00668948
GO:0097237	0.00603364	19.445	0.117637	2	119	cellular response to toxic substance	Hypo	0.00668948
GO:0072521	0.00616919	9.32309	0.384544	3	389	purine-containing compound metabolic process	Hypo	0.00669423
GO:0055076	0.00705396	17.9034	0.127522	2	129	transition metal ion homeostasis	Hypo	0.00749484
GO:0098754	0.00872083	15.9981	0.14235	2	144	detoxification	Hypo	0.00904113
GO:0033683	0.00886386	134.156	0.0088969	1	9	nucleotide-excision repair, DNA incision	Hypo	0.00904113
GO:0034614	0.00931215	15.4494	0.147293	2	149	cellular response to reactive oxygen species	Hypo	0.00931215

## Sheet: CS4.promotersMethylation.GOenrichment
GOBPID	Pvalue	OddsRatio	ExpCount	Count	Size	Term	Meth_direction	p.adjusted
GO:1903039	0.000848902	10.6595	0.429842	4	231	positive regulation of leukocyte cell-cell adhesion	Hyper	0.00933675
GO:0050857	0.000979808	49.687	0.0465197	2	25	positive regulation of antigen receptor-mediated signaling pathway	Hyper	0.00933675
GO:0051491	0.00114372	45.7067	0.0502413	2	27	positive regulation of filopodium assembly	Hyper	0.00933675
GO:0032652	0.00152208	14.694	0.228877	3	123	regulation of interleukin-1 production	Hyper	0.00933675
GO:0038115	0.00186079	Inf	0.00186079	1	1	chemokine (C-C motif) ligand 19 signaling pathway	Hyper	0.00933675
GO:0043143	0.00186079	Inf	0.00186079	1	1	regulation of translation by machinery localization	Hyper	0.00933675
GO:2000522	0.00186079	Inf	0.00186079	1	1	positive regulation of immunological synapse formation	Hyper	0.00933675
GO:2000526	0.00186079	Inf	0.00186079	1	1	positive regulation of glycoprotein biosynthetic process involved in immunological synapse formation	Hyper	0.00933675
GO:0006954	0.00263891	4.95399	1.43281	6	770	inflammatory response	Hyper	0.00933675
GO:0030335	0.00294368	5.77861	1.0011	5	538	positive regulation of cell migration	Hyper	0.00933675
GO:0002696	0.00296584	7.49622	0.604757	4	325	positive regulation of leukocyte activation	Hyper	0.00933675
GO:2000107	0.00315922	26.5457	0.0837355	2	45	negative regulation of leukocyte apoptotic process	Hyper	0.00933675
GO:0050865	0.00355057	5.52164	1.04576	5	562	regulation of cell activation	Hyper	0.00933675
GO:0061890	0.00371822	553.677	0.00372158	1	2	positive regulation of astrocyte activation	Hyper	0.00933675
GO:0070236	0.00371822	553.677	0.00372158	1	2	negative regulation of activation-induced cell death of T cells	Hyper	0.00933675
GO:0097022	0.00371822	553.677	0.00372158	1	2	lymphocyte migration into lymph node	Hyper	0.00933675
GO:1904808	0.00371822	553.677	0.00372158	1	2	positive regulation of protein oxidation	Hyper	0.00933675
GO:2000525	0.00371822	553.677	0.00372158	1	2	positive regulation of T cell costimulation	Hyper	0.00933675
GO:0051272	0.00391475	5.39149	1.06995	5	575	positive regulation of cellular component movement	Hyper	0.00933675
GO:0040017	0.00397309	5.37199	1.07368	5	577	positive regulation of locomotion	Hyper	0.00933675
GO:0034097	0.00532768	4.26033	1.65238	6	888	response to cytokine	Hyper	0.00947199
GO:0046103	0.00557231	276.823	0.00558237	1	3	inosine biosynthetic process	Hyper	0.00947199
GO:1902897	0.00557231	276.823	0.00558237	1	3	regulation of postsynaptic density protein 95 clustering	Hyper	0.00947199
GO:2000547	0.00557231	276.823	0.00558237	1	3	regulation of dendritic cell dendrite assembly	Hyper	0.00947199
GO:0032102	0.00647001	5.97221	0.75362	4	405	negative regulation of response to external stimulus	Hyper	0.00947199
GO:0002408	0.00742305	184.538	0.00744316	1	4	myeloid dendritic cell chemotaxis	Hyper	0.00947199
GO:0002885	0.00742305	184.538	0.00744316	1	4	positive regulation of hypersensitivity	Hyper	0.00947199
GO:0006154	0.00742305	184.538	0.00744316	1	4	adenosine catabolic process	Hyper	0.00947199
GO:0006543	0.00742305	184.538	0.00744316	1	4	glutamine catabolic process	Hyper	0.00947199
GO:0032447	0.00742305	184.538	0.00744316	1	4	protein urmylation	Hyper	0.00947199
GO:0038116	0.00742305	184.538	0.00744316	1	4	chemokine (C-C motif) ligand 21 signaling pathway	Hyper	0.00947199
GO:0097029	0.00742305	184.538	0.00744316	1	4	mature conventional dendritic cell differentiation	Hyper	0.00947199
GO:1902952	0.00742305	184.538	0.00744316	1	4	positive regulation of dendritic spine maintenance	Hyper	0.00947199
GO:0045785	0.0077127	5.66791	0.792696	4	426	positive regulation of cell adhesion	Hyper	0.00947199
GO:0022407	0.00829051	5.54657	0.809444	4	435	regulation of cell-cell adhesion	Hyper	0.00947199
GO:0002682	0.00870741	3.43997	2.41717	7	1299	regulation of immune system process	Hyper	0.00947199
GO:0006955	0.00874748	3.17689	3.04797	8	1638	immune response	Hyper	0.00947199
GO:0090559	0.00899795	15.1911	0.143281	2	77	regulation of membrane permeability	Hyper	0.00947199
GO:2000145	0.0091716	3.77444	1.85149	6	995	regulation of cell motility	Hyper	0.00947199
GO:0006771	0.00927046	138.395	0.00930395	1	5	riboflavin metabolic process	Hyper	0.00947199
GO:0010572	0.00927046	138.395	0.00930395	1	5	positive regulation of platelet activation	Hyper	0.00947199
GO:0032218	0.00927046	138.395	0.00930395	1	5	riboflavin transport	Hyper	0.00947199
GO:0032690	0.00927046	138.395	0.00930395	1	5	negative regulation of interleukin-1 alpha production	Hyper	0.00947199
GO:0034227	0.00927046	138.395	0.00930395	1	5	tRNA thio-modification	Hyper	0.00947199
GO:0036414	0.00927046	138.395	0.00930395	1	5	histone citrullination	Hyper	0.00947199
GO:1903347	0.00927046	138.395	0.00930395	1	5	negative regulation of bicellular tight junction assembly	Hyper	0.00947199
GO:0051707	0.00974625	3.36106	2.46927	7	1327	response to other organism	Hyper	0.00974625
GO:0099170	0.000238075	30.4321	0.124731	3	15	postsynaptic modulation of chemical synaptic transmission	Hypo	0.00701529
GO:0009266	0.000479169	5.46915	1.38036	7	166	response to temperature stimulus	Hypo	0.00701529
GO:0043652	0.000494809	22.8188	0.157993	3	19	engulfment of apoptotic cell	Hypo	0.00701529
GO:0019800	0.000675471	80.6194	0.041577	2	5	peptide cross-linking via chondroitin 4-sulfate glycosaminoglycan	Hypo	0.00701529
GO:0007215	0.0007846	10.64	0.41577	4	50	glutamate receptor signaling pathway	Hypo	0.00701529
GO:2000675	0.00100768	60.461	0.0498924	2	6	negative regulation of type B pancreatic cell apoptotic process	Hypo	0.00701529
GO:0042472	0.0011787	6.82931	0.789963	5	95	inner ear morphogenesis	Hypo	0.00701529
GO:0035989	0.00140306	48.366	0.0582078	2	7	tendon development	Hypo	0.00701529
GO:0060729	0.00140306	48.366	0.0582078	2	7	intestinal epithelial structure maintenance	Hypo	0.00701529
GO:0099542	0.00140306	48.366	0.0582078	2	7	trans-synaptic signaling by endocannabinoid	Hypo	0.00701529
GO:0007605	0.00170818	5.07189	1.26394	6	152	sensory perception of sound	Hypo	0.00776445
GO:0043583	0.00193993	4.25137	1.75455	7	211	ear development	Hypo	0.00808304
GO:0007196	0.00237911	34.5431	0.0748386	2	9	adenylate cyclase-inhibiting G protein-coupled glutamate receptor signaling pathway	Hypo	0.00829417
GO:0042048	0.00237911	34.5431	0.0748386	2	9	olfactory behavior	Hypo	0.00829417
GO:0052548	0.00248825	3.09088	3.45089	10	415	regulation of endopeptidase activity	Hypo	0.00829417
GO:0099177	0.00295162	3.01458	3.53405	10	425	regulation of trans-synaptic signaling	Hypo	0.00848511
GO:0010944	0.0029577	30.2234	0.083154	2	10	negative regulation of transcription by competitive promoter binding	Hypo	0.00848511
GO:0048706	0.00328704	5.3368	0.997848	5	120	embryonic skeletal system development	Hypo	0.00848511
GO:0021559	0.00359531	26.8637	0.0914694	2	11	trigeminal nerve development	Hypo	0.00848511
GO:1902093	0.00359531	26.8637	0.0914694	2	11	positive regulation of flagellated sperm motility	Hypo	0.00848511
GO:0035329	0.00383863	10.4198	0.315985	3	38	hippo signaling	Hypo	0.00848511
GO:0021879	0.00413345	10.1298	0.324301	3	39	forebrain neuron differentiation	Hypo	0.00848511
GO:0009581	0.00418744	5.02851	1.05606	5	127	detection of external stimulus	Hypo	0.00848511
GO:2000344	0.00429092	24.1759	0.0997848	2	12	positive regulation of acrosome reaction	Hypo	0.00848511
GO:0009582	0.00462259	4.90696	1.081	5	130	detection of abiotic stimulus	Hypo	0.00848511
GO:0061053	0.00464885	6.34476	0.673548	4	81	somite development	Hypo	0.00848511
GO:0010839	0.00504355	21.9768	0.1081	2	13	negative regulation of keratinocyte proliferation	Hypo	0.00848511
GO:0050877	0.00575504	1.96124	11.6166	21	1397	nervous system process	Hypo	0.00848511
GO:0003188	0.0058522	20.1442	0.116416	2	14	heart valve formation	Hypo	0.00848511
GO:0010752	0.0058522	20.1442	0.116416	2	14	regulation of cGMP-mediated signaling	Hypo	0.00848511
GO:1990830	0.00648386	5.7449	0.740071	4	89	cellular response to leukemia inhibitory factor	Hypo	0.00848511
GO:0080154	0.00671592	18.5936	0.124731	2	15	regulation of fertilization	Hypo	0.00848511
GO:0099536	0.00692192	2.31901	5.97046	13	718	synaptic signaling	Hypo	0.00848511
GO:0046068	0.00763373	17.2644	0.133046	2	16	cGMP metabolic process	Hypo	0.00848511
GO:0000453	0.0083154	Inf	0.0083154	1	1	enzyme-directed rRNA 2'-O-methylation	Hypo	0.00848511
GO:0001985	0.0083154	Inf	0.0083154	1	1	negative regulation of heart rate involved in baroreceptor response to increased systemic arterial blood pressure	Hypo	0.00848511
GO:0003409	0.0083154	Inf	0.0083154	1	1	optic cup structural organization	Hypo	0.00848511
GO:0035602	0.0083154	Inf	0.0083154	1	1	fibroblast growth factor receptor signaling pathway involved in negative regulation of apoptotic process in bone marrow cell	Hypo	0.00848511
GO:0035603	0.0083154	Inf	0.0083154	1	1	fibroblast growth factor receptor signaling pathway involved in hemopoiesis	Hypo	0.00848511
GO:0035604	0.0083154	Inf	0.0083154	1	1	fibroblast growth factor receptor signaling pathway involved in positive regulation of cell proliferation in bone marrow	Hypo	0.00848511
GO:0035607	0.0083154	Inf	0.0083154	1	1	fibroblast growth factor receptor signaling pathway involved in orbitofrontal cortex development	Hypo	0.00848511
GO:0060466	0.0083154	Inf	0.0083154	1	1	activation of meiosis involved in egg activation	Hypo	0.00848511
GO:0070367	0.0083154	Inf	0.0083154	1	1	negative regulation of hepatocyte differentiation	Hypo	0.00848511
GO:0071678	0.0083154	Inf	0.0083154	1	1	olfactory bulb axon guidance	Hypo	0.00848511
GO:0099050	0.0083154	Inf	0.0083154	1	1	vesicle scission	Hypo	0.00848511
GO:1905705	0.0083154	Inf	0.0083154	1	1	cellular response to paclitaxel	Hypo	0.00848511
GO:2000287	0.0083154	Inf	0.0083154	1	1	positive regulation of myotome development	Hypo	0.00848511
GO:2000438	0.0083154	Inf	0.0083154	1	1	negative regulation of monocyte extravasation	Hypo	0.00848511
GO:2000560	0.0083154	Inf	0.0083154	1	1	positive regulation of CD24 production	Hypo	0.00848511
GO:0050896	0.00993882	1.50317	68.652	83	8256	response to stimulus	Hypo	0.00993882
